# Supplementary material for: Redundant SCARECROW genes pattern distinct cell layers in roots and leaves of maize
Source: PubMed Central journal article supplement (PMC6679360; doi:10.1242/dev.177543), 2019-07-19
Supplement: develop-146-177543-s1.pdf [file develop-146-177543-s1.pdf]

**Table S1.** Phenotypic data gathered during this study.

[Click here to Download Table S1](#)

**Table S2.** Top 100 BLASTp hits returned using ZmSCR1 as a query.

[Click here to Download Table S2](#)

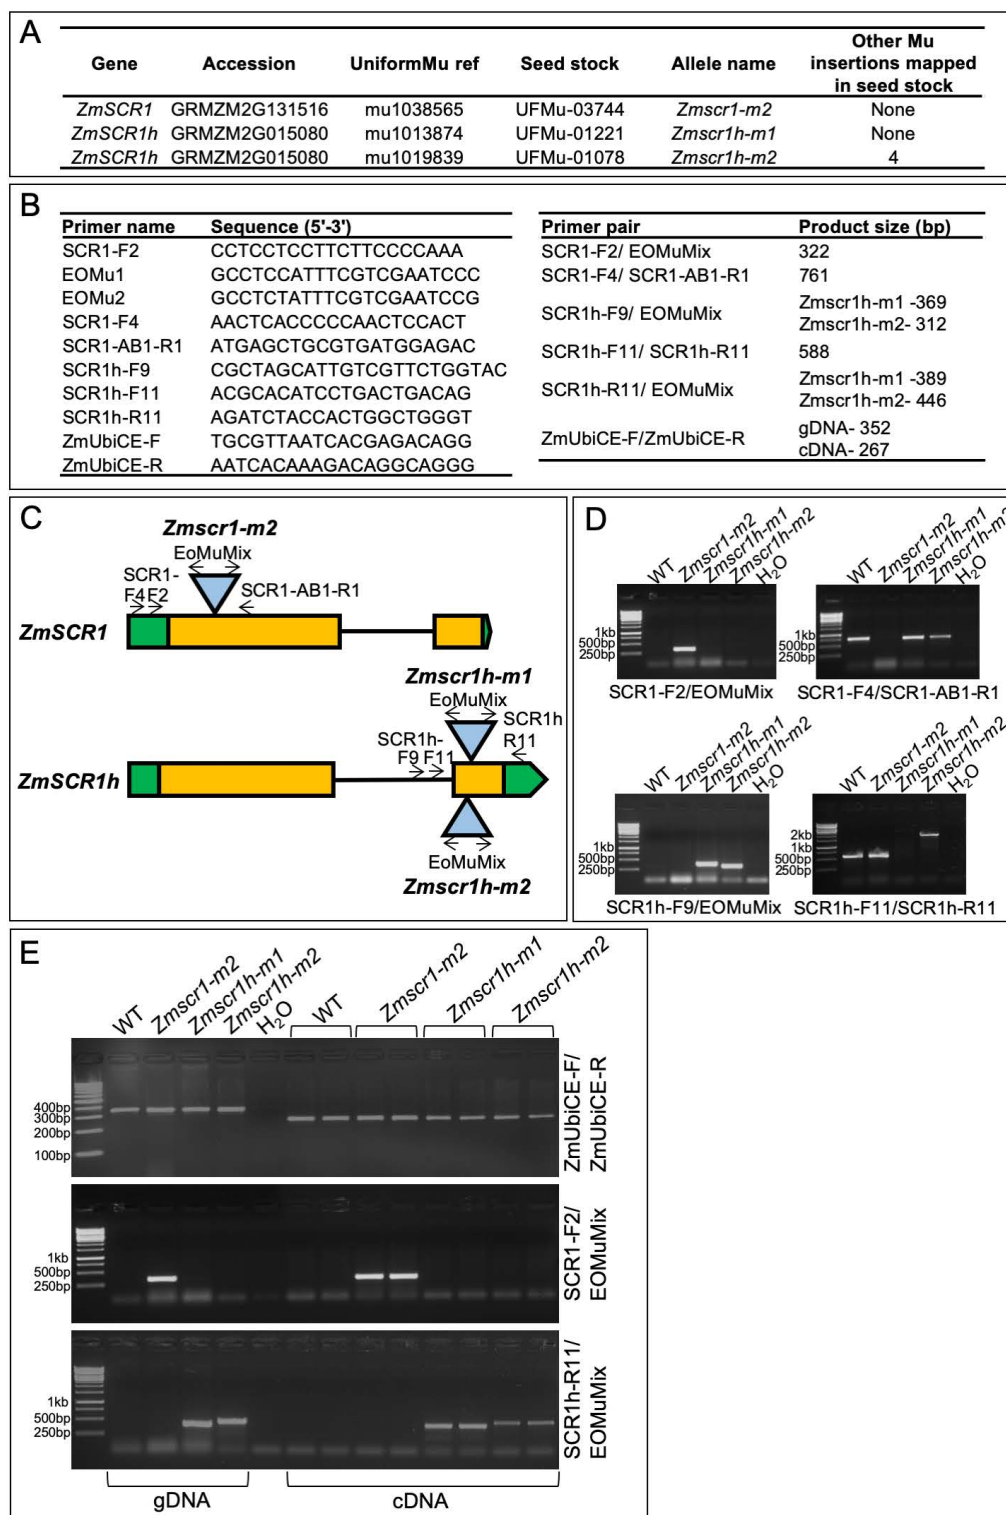

**Figure S1. Validation of insertion alleles.** **A)** Details of alleles provided by the UniformMu project. **B)** Primers used in this study. **C)** Schematic representation of each mutant allele, with the position of genotyping primers indicated. **D)** Agarose gels showing fragments amplified from WT and mutant alleles of both *ZmSCR1* and *ZmSCR1h*, with different primer pairs as indicated. Genomic DNA was used as template in all cases. **E)** Agarose gels of fragments amplified from genomic DNA or cDNA (copy of RNA extracted from leaf primordia), using primer pairs as indicated. Transposon sequences are present in the transcripts of each mutant allele.

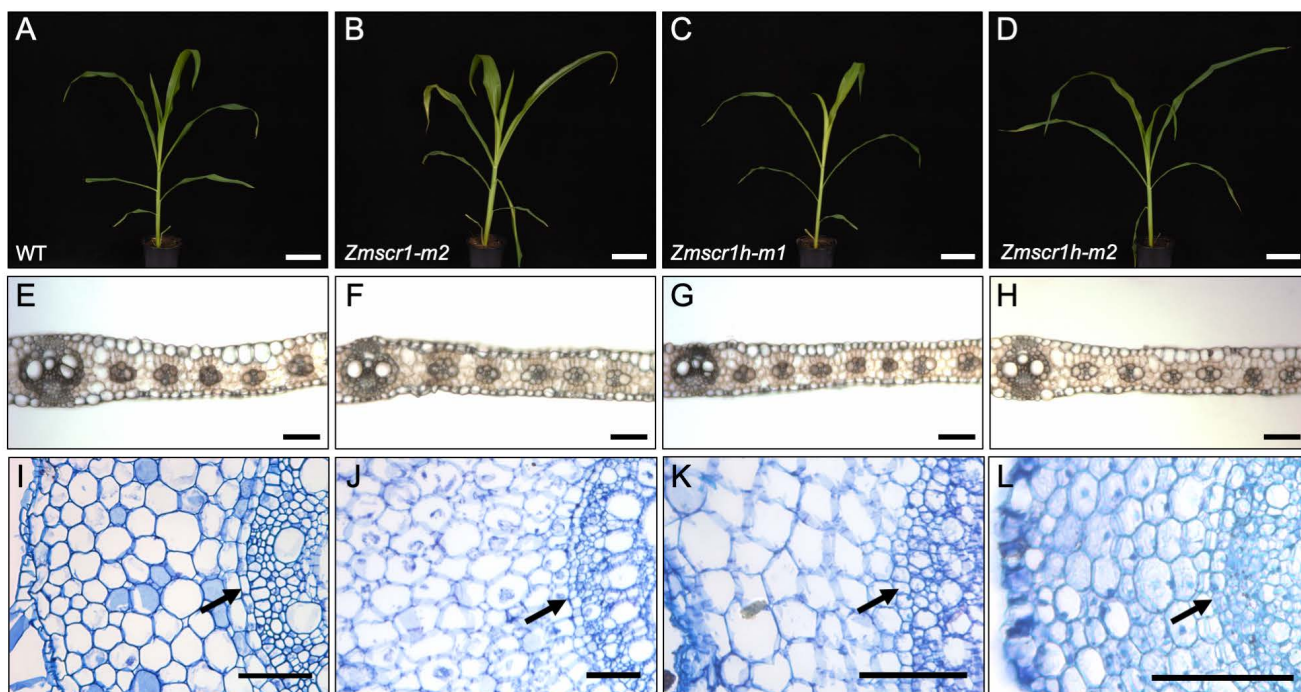

**Figure S2. Growth and development characteristics of *Zmscr1* and *Zmscr1h* single mutants. A-D)**

Representative whole plant phenotype at 32 days after planting. **E-H)** Representative transverse sections of fully expanded leaf 5 of WT (E), *Zmscr1-m2* (F) *Zmscr1h-m1* (G) and *Zmscr1h-m2* (H) plants.

Representative transverse sections of seminal roots of WT (I), *Zmscr1-m2* (J) *Zmscr1h-m1* (K) and *Zmscr1h-m2* (L) plants. Arrows indicate the endodermal layer positioned between vasculature and cortex. Scale bars = 10cm (A-D); 100µm (E-L).

| <b>A</b> | <b>Genotype</b>             | <b>Latest emerged leaf 31 days after planting (n=7)</b> | <b>Mean</b> | <b>Mode</b> |
|----------|-----------------------------|---------------------------------------------------------|-------------|-------------|
|          | WT ( <i>m2m1</i> )          | 8, 8, 8, 8, 7, 8, 8                                     | 7.86        | 8           |
|          | <i>Zmscr1-m2;Zmscr1h-m1</i> | 6, 7, 6, 7, 7, 6, 7                                     | 6.57        | 7           |

  

| <b>B</b> | <b>Genotype</b>             | <b>n</b> | <b>Total number of veins across leaf width (<math>\pm</math> s.e.m)</b> |
|----------|-----------------------------|----------|-------------------------------------------------------------------------|
|          | WT ( <i>m2m1</i> )          | 7        | 201.54 $\pm$ 3.13                                                       |
|          | <i>Zmscr1-m2;Zmscr1h-m1</i> | 7        | 172.69 $\pm$ 8.54                                                       |
|          | WT ( <i>m2m2</i> )          | 4        | 273.53 $\pm$ 5.51                                                       |
|          | <i>Zmscr1-m2;Zmscr1h-m2</i> | 5        | 233.96 $\pm$ 11.13                                                      |

**Figure S3. Quantification of *Zmscr1;Zmscr1h* growth characteristics.** **A)** Quantification of the latest emerged leaf in segregating WT and *Zmscr1-m2;Zmscr1h-m1* mutants. **B)** Quantification of the total number of veins across the width of the leaf, calculated by multiplying leaf width by vein density. s.e.m indicates standard error of the mean.

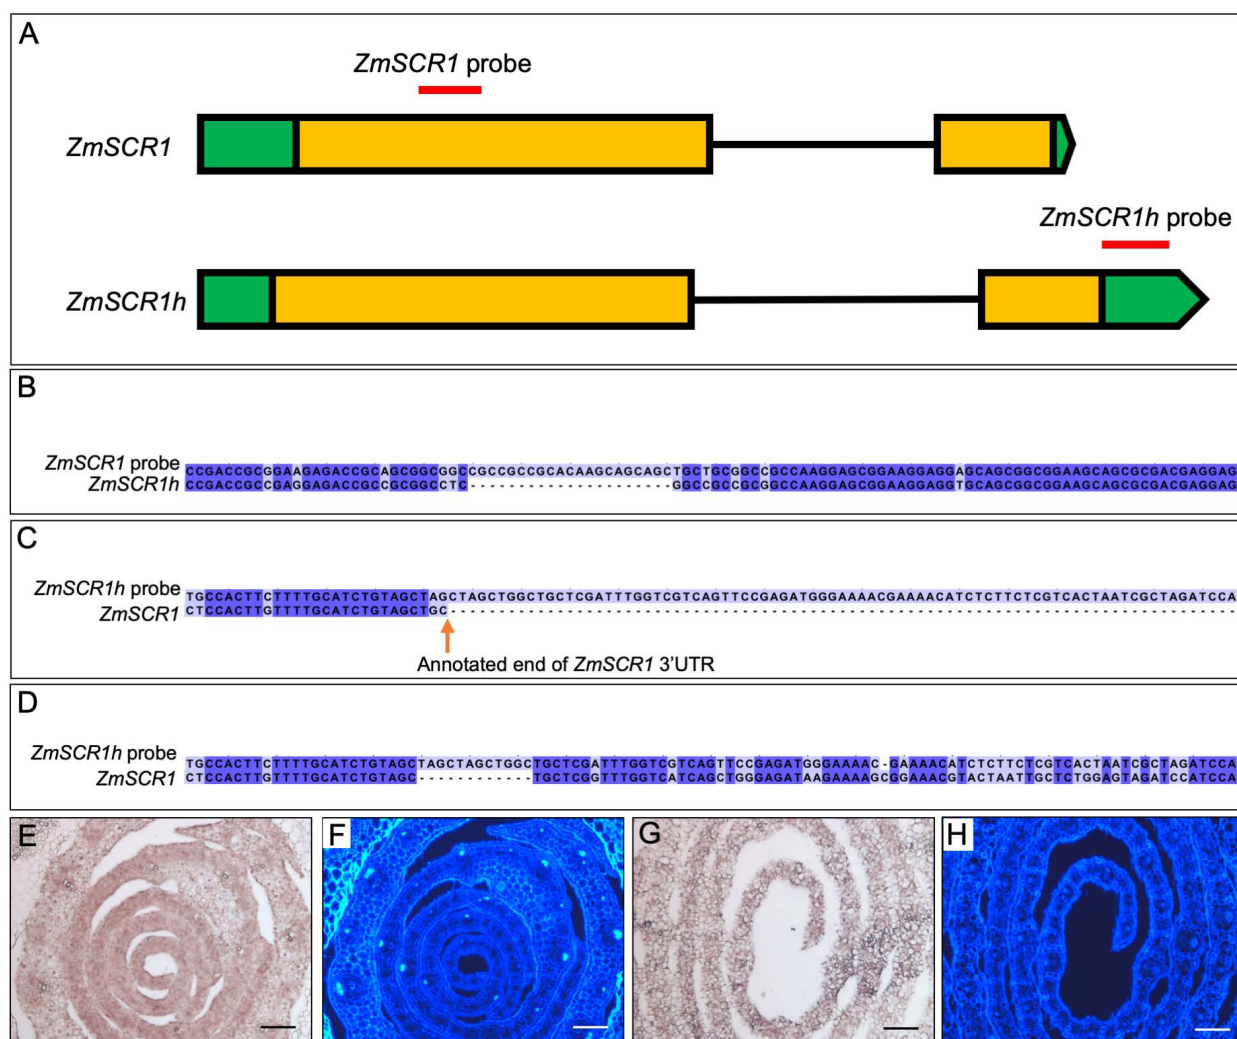

**Figure S4. *In situ* hybridization probe design.** **A)** Cartoon showing position of *ZmSCR1* and *ZmSCR1h* probes. Green indicates UTRs; orange indicates exons; black lines indicate introns; Red lines indicate hybridization probes. **B-D)** Alignment of the *ZmSCR1* probe with the *ZmSCR1h* gene sequence (**B**); the *ZmSCR1h* probe with the *ZmSCR1* annotated gene sequence (**C**); or the *ZmSCR1h* probe with the annotated *ZmSCR1* gene sequence and region downstream of the of the 3'UTR end (**D**). Dark blue indicates identical sequence, light blue indicates differences. **E-H)** *In situ* hybridization of sense *ZmSCR1h* probe used as a negative control for background signal accumulation. Cross sections were imaged under both brightfield (**A**, **C**) and UV (**B**, **D**) illumination to show hybridization signal and calcofluor staining of cell walls respectively. Both younger (**A**, **B**) and older leaf primordia (**C**, **D**) were hybridized. Scale bars = 100 $\mu$ m.

**Figure S5. Protein alignment of top 100 BLASTp hits returned using ZmSCR1 as a query.**

```
>Pp3c18_4830V3.1.p
-----
-----MTLQILSKRSC-----PVE---VGPSAKRW-----
-----KSQSSW-AIEGVAPVAATSAAAEAAEGSACVKQEDPITL-----
-----
-----QEPTSVLIDLQ-----TSPGRSS-SSGSLSSHSSLSGDETSFPFLAGTDICSEDQTSS
ELLPVSTVES-----VHNDHDIASWMECMEDPNGPLALTDTSKCEEGGEVRQ-AEVKLDGGIETGIDH
FVNADIDFGFEL-SLDDNDHEAFANYMLSDPGLCLMDE-----
-----PKFLNFPEGFQDAHRLLELGDS--LSSMIDSAPG
IG-----
-----VGEVQSSD-A-----SSTPGSDVSYEPGYSGS
QNW--ESNPLEV-----QQPLDSGLQLV-HLLLACAEAEIESNFDTARPMLSRLLK
AISNPYGDPMQRISLYFADALSDRLTKESE-----TPVSAAP-----ISSPVELD--TDLAYQ
S-FYE-----VLPFAKFTHTANQAI FEAVGYHNKIHVVDLDIQ-QG--L---QWPSFL
QTLA-LRP---GGP---P-SLKITAVGTNAA-----SLQLTKRRLSEFAQALEVPFELI-VLV-EDL
DNL-DK-----EKF-----QIE-----PDEALAVNCSQVLHRLS-GSEAV---LQKLLLLL
S-LNPEVVTLLVEAN--HN-----GANLISRFVEALHYICALFDALEAS-----
-----VS-----SDS-PDRFRIENITLASEIRGIVALEGSGRG-AR-HVKS-ETWQSHFTKCGFRNRPL
SSYA-VQQAQLLL--GYFVT-----GETPTYKLS---EE--FGVLIMGWQDTPVMAVSSWSC-----
-----
>Solyc09g066450.1.1
-----
-----
-----
-----
-----MMKGESELIHQHTPLDQPNEQWDYCSPNHPSK
TLITENRANN-----PDQRNELSQWVEQVTRQLLIED-----
-----
-----
-----LPENEFSDT-----DTATYHVS-ALLGELRPKKIARRDCNSEGIGGQQQHEWNSSTHDDHV
ARDEMGVKGM-----SGLDEQGLNLI-TLLEGAVAISVDNLGEAHRVLELT
QVASPYGPSCAERVVAYFAKAMASRVINSWL-----GICSPL-----INYKT--VHTALQ
A-FNN-----ISPFIKFAHFTSNQAI LEAFHRRDRVHIIDVDIM-QG--L---QWPALF
HILA-TRM---EGP---P-HVTMTGVGTSME-----LLIETGKQLSNFAKRLGMSFEFH-PVV-GKT
GEI-DI-----STF-----KIS-----RGEAIAIHWVQ--HSLY-DATGP---DWKTMRLQ
Q-LSPRVVTLVEQEIA--L-----GGSFDRFVGSLSHYSTIFDSLGA-----
-----LE-----SDD-SSRHSVEHGLLYREINNILAIGGPAP--NG-EDKF-RHWRSELSKNGFIQVPM
STNS-MAQAQLIL--NMFPP-----AH--GYSLV---QG--DGTLLRLGWKDTSLFTASAWTSPNSR---
-----
>LOC_Os11g03110.1
-----
-----MGSSSLLLFPSSSSSAT-----HSSYSPSSSSHAITSLLPPLP-----
-----SDHLLLYLDH-QEQH-H-----LAAAMVRKRPASDMD-----
-----
-----LPPRRRHVTGDLSDVTAAAAPS-----SASAQLPALPTQL-----P-AFH-
-----HTDMDLAAP-----APPPPQQQVAAGEGGP-----PSTAWVDGIIRDIIAS-----S-GAAVSVA
QLIHNVREII-----RPCNPDLASILELRLRSL-----
-----
-----TS
```

DPAPPPPPPSHP----ALLPPDATAPPPPT-SVAALPPPPPPQ---PDKRRR-----E-----PQC  
QEQEPNQP---QSPK-----PP-----TAEET-----AAAA  
AAAKERKEEQRR-----KQRDEEGLHLL-TLLLQCAESVNADNLDEAHRALLEIA  
ELATPFGTS-TQRVAAYFAEAMSARLVSSCL-----GLYAPLPNPS-PA----AARLHGR--VAAAFQ  
V-FNG-----ISPFVKFSHFTANQAIQEAFEREERVHIIDLDIM-QG--L----QWPGLF  
HILA-SRP----GGP----P-RVRLTGLGASME-----ALEATGKRLSDFADTLGLPFEFC-PVA-DKA  
GNL-DP-----EKL-----GVT-----RREAVAVHWLR--HSLY-DVTGS---DSNTLWLIQ  
R-LAPKVVTMVEQDLS--H-----SGSFLARFVEAIHYYSALFDSLSDAS-----  
-----YS-----EDS-PERHVVEQQLSREIRNVLAVGGPAR--TG-DVKF-GSWREKLAQSGFRVSSL  
AGSA-AAQAVLLL--GMF-P-----SD--GYTLI---EE--NGALKLGWKDLCLLTASAWRPIQAS-GR  
-----

>GRMZM5G821439\_P01

-----MDLHQLLKYRLTGANVYEFPTENNLANTPWPA-----  
-----SPLKSEFSSSSYTPLSSQLECDNLSALSNTPDNQ-SSTETISAQ---SISPLEVDSSYKQAA  
I-LRENTQVRPDPLYT-----TSRHNMQHALREIE-TVLMA---PDADDAATSTKHEFEHKPAQLMRQR  
SRTWSHESRQ-----  
-----PSPGVVRTQLAS-GYPT  
ASYEFRPEKRLR-----ELREDPQSMVK-QLLTKCAEALSEERIEEFLNLVQQAR  
GVVSIITGEP-IQRLGAYLLEGLVARHANSQT-----NIYRALK-----CREPESNE--LLSYMK  
I-LYN-----ICPYLKFGYMAANGAIAEALRNEDRIHIIDFQIA-QG--T----QWITLI  
QALA-ARP----GGP----P-HVRITGIDDPVSEYARGEGLDLVGKMLKSMSEEFRIPLLEFT-PLPGIYA  
TQV-TK-----EML-----DIR-----SGEALAVNFTLQLHHTPDDESVDVNNPRDGLLRMVK  
G-LSPKVTTLVEQESH--TN-----TTPFLMRFTETLDYYSAMFESIDTN-----  
-----LP-----RDN-KERINVEQHCLAKDIVNIIACEGKDRV-ER-HELL-GKWSRSLTMAGFRPYPL  
SSYV-NSVIRKLL--ACY-----SD--KYTLE---EK--DGAMLLGWKNRKLISASAWH-----  
-----

>Pp3c19\_8310V3.1.p

-----MAYQY-----SPGGSRWKPTGGTLV-----  
-----DGRLRHDKFTQASDAVQQLEELHTSLGVSQDSLNI PAY---  
-----  
YTLGSSSQAV-----SNCSTDLAGWIDCMIEELSSNT-----  
-----  
-----ACPIMAPQQQHGLLEGSFLKNDHDASSCR  
DSLLETGSHRLSNVQF-----QD TSAARN-K-----SSTAPHNGTSQVNAIRT  
TAAGLEQQLNKM-----GEDENNGIQLV-HSLLACAESIQRGNLSFAEETLRRIE  
LLSLPPG-P-MGKVATHFIGALTRRIYGVASSSGNN-----SSSNQSDS--LLGLLH  
FYFYE-----SCPFLRF AHFTANQAILEAVTGLKEVHVIDFNLM-QG--L----QWPALI  
QALS-LRQ----GGP----P-RLRLTGIGPPQP--SGSDTLQEIGTKLAELAKTVRVD FEFRGVIA-VKL  
DDI-KP-----WML-----QIR-----HGEAVAVNSVLQLHKLK-YSAGPEAPIDAVLLLVR  
E-LKPKIFTIVEHEAN--HN-----QPSFLGRFIEALHYYSTMFDALEAC-----  
-----NLP-----SEN-NEQV-LIEMYLGREIYNIVACEDGART-ER-HENL-FQWRLRLLKAGYRPIQL  
GLNA-FKQASMLL--TMFS-----GE--GYRVE---EK--LGCLTLGWHSRPLIAASAWKCA-----

>Pp3c21\_17650V3.1.p

-----  
-----MFIEEQ  
IRWIMEV I I W T W T S R A S I R D G F F S S G L A Q A R S G N V Q H L Y ----- Q T Q P L L I N A E P G N S L -----  
-----GKI-ADAVPSHQHQHVPQFDMPQHRTHSFSAHNASENVK-----  
-----DQFAGLDEDAVSQWVDGMIRGMMEV-----MPGMPIE  
HLFANLSEAL-----APGYVNAERVIRSLRHPLYASARGRVQNTLPIDLARA-GKRPRVEYNDGAKGQ  
VYRENANSSQNTSQTf-----  
-----KNAISGLHDRQENVMQIQAA---VSHPSPELRE  
DQQLPFSSSQKRTDDNLQLSLEPADERSLRHLHTTRQPSL-SKFGHQGVTSRDS PGPSHLKQYPQIQPHY  
HQKPKLGNITILDFDVR-----SSVSQCSA-Q-----NARDCQGLPSLPLDVPQ  
TSSQKRQSHE-----PSTSQEGLQLL-ALLLQCAEAVSSGNHDEANTILPQLR  
EQVTPYGSS-VQRVVAYFAEGMASRLVTSCl-----GINSPLPRN-----DLVNNPS--FTSAIQ  
V-FNE-----ICPFVKFSHFTAIQAISEAFEGMNNVHVIDMDIM-HG--L---QWHLLL  
QNLA-KRP---GGP---P-HVHITGLGTSVE-----TLDATGKRLIDFAATLGVSFQFT-AVA-EKF  
GKL-DP-----SAL-----KVE-----FSDALAVHWMH--HSLY-DVSGC---DSATLGLMH  
K-LSPKIIITIVEQDLR--H-----GGPFLNRFVEALHYYSALFDSL GAS-----  
-----YN-----RKS-LKRHMVEQQLLSCEIKNILAIGGPGR--SG-TTKF-DHWRDKLSEAGFNPVAL  
SAQA-VHQAALLLSQGFY-P-----GE--GYTLL---ED--LGALKL GWEDLCLFTASAWTST-----  
-----

>Seita.8G008700.1.p

-----MGSSSLLLFPSSSSAASPA-----YSHATA--STSSHSSLLPPLP-----  
-----SPQ---DHLLQYLHHL DQQQ-Q-----ESAAMVRKRPAPDMD-----  
-----LPPRRHVTDGLSDVTA AAAASG-GGAPPPQ--SAATSAQLPALPTQL---HL--P-AFQA  
Q-QQHHHHA EVDAP-----PAGEVAA---STTAWVDGIIRDIIGS---SGGAVVSVA  
QLIHNVREII-----HPCNPGLASLLELRLRSLN-----  
-----AA  
DPAAPLHQPLPHP-----PALP-PVPALPPPPPQLTVTDKRRH-----E-----PQ  
QVGEPTNPSPQEEPK-----PP-----TAEETAAAAAAAAAAAA  
AAAKERKEEQRR-----KQRDEEGLHLL-TLLLQCAEAVNADNLDDAHQTLLEIA  
ELATPFGTS-TQRVAAYFAEAM SARLVSSCL-----GLYAPLPPAS-PA---AARLHGR--VAAAFQ  
V-FNG-----ISPFVKFSHFTANQAIQEAFEREERVHIIDL DIM-QG--L---QWPGLF  
HILA-SRP---GGP---P-RVRLTGLGASME-----ALQATGKRLSDFADTLGLPF EFC-AVA-EKA  
GNV-DP-----EKL-----GVT-----RREAVAVHWLH--HSLY-DVTGS---DSNTLWLIQ  
R-LAPKVVTMVEQDLS--H-----SGSFLARFVEAIHYYSALFDSL DAS-----  
-----YG-----EDS-PERHVVEQQLSREIRNVLAVGGPAR--TG-DVKF-GSWREKLAQSGFRSASL  
AGSA-AAQASLLL--GMF-P-----SD--GYTLV---EE--NGVLKLGWKDLCLLTASAWRPIQTP-CR  
-----

>Seita.9G123000.1.p

-----  
-----  
---MKREYQDA-----GGS--GGDMGSSKDKMMAA-----AGAGEQDEE-VDELL-----  
-----AALGYKVRSSDMADVAQKLEQLEMAMGM---GGAGAAAD---  
-----DG  
FVSHLATDTV-----HYNPSDLSSWVESMLSELNAPPPPLPPA-----



-----PPAPRLASTSSTVTGGAAAG---GVYFD-LPP  
AVDSSSSTYALKPIPSPA-AASA-----DP-STDSAREP-----  
--KRMRTGGGSTSSSS-----SSSSSLDG-G-----RTRSSVVEAAPPAAQAS  
AAASGPAVPVVV-----VDTQEAGIRLV-HALLACAEAVQQENFAAAEALVKQIP  
MLASSQGGA-MRKVAAYFGEALARRVYRFRPAD-----SLLDAA--FADLLH  
AHFYE-----SCPYLKFAHFTANQAILEAFAGCRRVHVVDVDFGIK-QG--M---QWPALL  
QALA-LRP----GGP----P-SFRLTGVGPPQP--DETDALQQVGWKLQFAHTIRVDFQYRGLVA-ATL  
ADL-EP-----FML-----QPD-GEDTDDEPEVIAVNSVFEHLRLL-AQPGA---LEKVLGTVR  
A-VRPRIVTVVEQEAN--HN-----SGSFLDRFTESLHYYSTMFDSLEGAGSDNSA-----  
ADASPAP-----AGG-TDQV-MSEVYLGRQICNVVACEGTERT-ER-HETL-GQWRNRLGRAGFEPVHL  
GSNA-YKQASTLL--ALFAG-----GD--GYRVE---EK--DGCLTLGWHTRPLIATSAWRAAAP-----  
-----

>Bradilg24310.1.p

-----  
-----  
-----MIQGVLSRASAAD-----AAAMK-AKRVAPIP-----  
-----  
-----  
-----  
-----  
-----

-----EDE-----EAAMVGAR-G-----KRLQLHSSGVQQQQA-  
-PAEEGKVVVVE-----AAAETRGLRLL-SLLLRCAEAVAMDLSPEARDLLHEIA  
ELASFGTS-PERVAAYFGDALCARVLSSYL-----GAYSPLA--LA-----SAQQSRR--VASAFQ  
A-YNA-----LSPLVKFSHFTANKAILQALDGEDRVHVVDLDM-QG--L---QWPGLF  
HMLASSRP---SKP---LL-SLRITGLGASLE-----VLEATGRRLADFAGSLGLPFEFR-PIE-GKI  
GHVADT-----DVLLL-----GRD-----EGEATVVHWMH--HCLY-DVTGS---DAGTVRVLR  
S-LRPKLVTIVEQDLG--H-----GGDFLGRFVEALHYYSALFDALGDG-----  
-----AGP---EEEEA-QQRHAVERQLLGAEIRNIVAVGGPKR--TG-EVRV-ERWGDELRRAGFRPVSL  
SGGP-AAQARLLL--GMC-P-----WK--GYTLV---EE--DGCLKLGWKDLSLLTASSWEPTTTDGDE  
EDDLGAAARQEECHGS-----

>Seita.3G200500.1.p

-----  
-----  
-----  
-----  
-----MSTGRGSDMQDSL SLM-QFHD--PYLYGGGAGGANLPLSSHSFLPHHHD-FVHA-----DDR  
CPGK-DVPEFVD-QA-----AAEVSC-E-----QELAVSKEVSEGGGDGA  
--VEEQNNGAAT-----TAARGEAAHGVVMI-ALLMECAVAVSVGNLADANGMLLELA  
QMASPYAPSCGERLVAYFTKAMAARLMSSWV-----GICAPLA-----PPFAA--VHAADR  
A-FYN-----VSPLARFAYLACNQGILEAFHGKCLVHIVDLVVDV--PGGAL----QWLSLL  
PALA-ARP----GGP----P-VLRVTGFGMSAS-----ALHDTGNQLAGLASKLGVPFIFY-AVA-RRP  
GD--DADAAA-AVP-----SRR-----PGEALAVHWLR--HALY-DAAGD---DGATMRLVR  
W-LEPKVLTLLVEQERG--APGDGGGGAGN----ERGHFLDRFVSALHYSALFDSL GAS-----  
-----RPA-----DED-ASRHLVEHGVLGREIGNVLA VGGPSR--SG-RDKF-GCWQTELARHGFLRAGG

-----GGRAQLVA--GACPA-----GL--GYTVA---DD-QDGTVRLGWKGTPLYAVSTWTWCPSPHAQ  
R-----

>Pp3c1\_2540V3.1.p

-----MSVQYRPELGTMLVTPGYPPGKEREYLSDTANSQQTPSYYGAQKSYADGQRQSAYGMKN  
KSHSSPVSPLS-----PQDSSQAASDNGQRMASAGWSSASYQSESSSHSDGSLE-----GP  
GKLEEDYYGRQHRHGEQLTGSVAYH-----NTPSSVLRPMGYPAETAQAYQ-----MPNYQQAV  
RYIPEEQYAQSQSNYA-----QRNPEMAHMLQVLE-SALLD-----DDDADLPGSLGNHDPASEGNWA  
DTIEEFMAADASPADSSTVTSATTP-----

-----PEYGKQCRNGSTNNYTG  
AVTARVEEPPPQ-----KLVVGTTRSSE-QLLVACAEALSNNMPLANVLIQNLN  
QVVSIIYGDPMQRLAAYMVEGLVARVAASGK-----GIYRSLK-----CKDPPTRD--LLSAMQ  
I-LYE-----VCPYFKFGYMAANGSIAEAFQNESRVHIIDFQIA-QG--T----QWTTLI  
QALA-ARP----GGP----P-HLRITGIDDPMPGPNAGVEMVGRKRLAKLAEAVGVPFDFH-PVA-KKG  
PEV-EA-----WML-----ERQ-----PGEALAVNFALHLLHMPDESVCSTSNPRDRILHMK  
A-LNPKVVTLVEQESN--TN-----TAPFFPRFLEAMNYAAIFESLDIT-----  
-----LA-----RES-KERVNVEQQCLARDIVNIIACEGIDRV-ER-HEMM-GKWRARLTMAGFRPYPL  
SQTV-NNTIKTLL--ESY-----SD--KYRLK---DE--GGALYLGWKNRSLIVSSAWQ-----

>LOC\_Os11g31100.1

-----MAGG-----GAKLQ-QQQAPTSPT-----  
-----ASVSESNIVAST-----ASADPEANDALAGLQALRFDDG---  
GDIDDVEIQSPDIALWESIFADQIGVSGAGADFLLS-----MSSAAASPRRDFMAC-----  
-----SPKRDMVTT-----SSPKRDMVTSSPKR-DYMVSSPKREYMTSPRREM-ATSPR  
RATFSNLYTS-----SHGGGGGGHHLHHSYVHG-GGMEGGGGHGAQPQY-GGLAGH-----GKGG  
AQ-SPLHKVYINNVGGGSGGGGKSNTPSTLSCASSYVVHGGESGLPSLPSMDP-FLE-----EG  
YLSYQLPEKA--AGGVGGGGGDINRSGASVSVVTAPASSQLLPTLSECLAMPEPAA--YRGGGDEAVA  
AAMAVAGELPVGAFVQPEMYGGGGGEGGGE-----GMTPE-----

-----PLQHQM-----AAD-S-----SLHSMLGS-----  
-----VIQSEA-----EQEQDQSLQLV-HLLACADLVSKGDHPAALRHLHLLR  
RVASPLGDS-MQRVASHFADALAARLSLLSSPTS-----ASPSRAAAAAAPYFPSPSPE--TLKVYQ  
I-LYQ-----ACPYIKFAHFTANQAI FEA FHGEDRVHVVDLDIL-QG--Y----QWPAFL  
QALA-ARP----GGP----P-TLRLTGVGHPA-----AVRETGRHLASLAASLRVPFEFHAAAA-DRL  
ERL-RP-----AAL-----HRR-----VGEALAVNAVNRHLRVP---SSH---LPPLLSMIR  
D-QAPKIITLVEQEAA--HN-----GPYFLGRFLEALHYYS AIFDSDLAT-----  
-----FP-----AES-TARMKVEQCLLAPEIRNVVACEGAERV-AR-HERL-ERWRRLMEGRGF EAVPL  
SAAA-VGQSQVLL--GLYGA-----GD--GYRLT---ED--SGCLLLGWQDRAIIAASAWRC-----

>Solyc07g043330.1.1

-----MLFVSAIPINHTSSY-----SSSMS-SKRSISEFT-----

-----  
-----  
-----  
-----PVSD-----EPQLLTR-----PRNERG  
EEEEEGEELLL-----VDADSIGLRL--GLLLQCAEFVAMENLDEAADLLPEIA  
ELSSPFGSS-AERVAAYFAESLSARIISHL-----RFYSPLN--LKSL----TLTHSQK--LFTALQ  
S-YNT-----ISPLIKFSHYTANQAIYQALEGEDHVHVIDLDIM-QG--L----QWPGLF  
QILS-SRS----RKL----R-SIRITGVGSSME-----LLESTGRRLTEFANSFGLPFEFQ-PFE-GKI  
GHITDL-----NQL-----GVK-----IGETTUVNWMH--HCLY-NITGS---DLGTFRLLT  
L-LRPKLITLVEQDLS--H-----GGNFLSRFVEALHYYSALFDALGDG-----  
-----LS-----EES-AERHRVEQQFLGSEIRNIVAVGGPKR--TG-EVPV-ERWGDELKRIGFLPVSL  
SGTP-AAQASLLL--GMF-P-----R--GYTLV---EE--NGCLKLWGDLSLLTASAWQPCD-----  
-----

>Pp3c2\_21080V3.1.p

-----  
-----  
-----  
-----MLFTGELDEVFRLPAVKTGRSSSPSQPRSGVSSPHGAPGPGSSPGLSGSPSYRGVVGNNRVLSPGKF  
MLKKGLEPRQIIERRGEQLSNTDTAGSPSFRAGTMMWPD-----QTATTCEAEKSSGQW-----  
-----RSPRCGEDHRSEGEPPGGFFHQHQNSASNSPLCPGTPIR---  
-----  
-----QHYPRTAPSTPLQGISSPDVKKCIAPMSEPRSVLDLTISP  
QQHQLP TIRA-----TLPRRFRETFLDHNVAAPSLSSSPRVLNFESCGS-VSPISGPFPSQYGPS  
LAKTTWAPDLATQGYPTSITTHKVEELSVLPTSQNYVQATTSS-----  
-----LDEWEAATTTSTQHNLRAKQWMAASLMED--LRNGDYSTSA  
QETEECTTPFTPGVDSCSPHFLAFQR-----  
-----GHSSPCPSD-----YTGDNDPG-G-----SGLEYLQVESPGGTPRG  
GGDGDVDDTH-----NSPAVVGHELV-TLLIACAEAVSTQSLSLVNHLLPKLG  
ELASPOGTA-MQRVAAYFTEGLACRVAHLWP-----HIYQPLPI-----ESSLNEEE--LQTAFH  
L-LNH-----VVPYTKFAHFTANDIILQGFEGADRVHVIDFDVK-QG--L----QWPALF  
QSLA-VRE----CGP----PSHIRITGIGECKE-----DLLETGDRLAEFEEFNIPFTFH-AVI-DRL  
EDV-RL-----WML-----HVK-----ENEAVAVNCISQLHRLLYDSGET---IEGFNLNIG  
S-TKPKVVAVVEQEGS--HN-----SPQFEGRFLESQYYSAVFDSLEAN-----  
-----IS-----RES-SARVQVEQ-LFAREIRNILSCEGTDRM-ER-HENI-SRWRSIMSRSGFVKVPL  
EDSA-YTQALILL--RMFD-----SD--GYTLA---EE--NGAVTLGWMEQPLLTASAWKPKDFVPT  
GTSLVTNEKQRAV-----  
>Seita.8G129500.1.p

-----  
-----  
-----  
-----MGMLNCADTSS-----GAKLQ-QLQAPTSPT-----  
-----ASVSESNIIVS-----STDPDANDALAGLQALKFD-----  
GDI-DVEIQSPDIAMWESLFAEQMGAS--GGDFLMSFSPRRDFTATGSP-RRDFMVS-----  
-----SPKRDYMM-----SSPKRDYMV-SSPKR-DYMMSSPKREYMTSPRRD---SSPR  
RSTFSNLYSG-----TGS-----HQQGYVDGVHGAEGGSGSGGGQPLY-GGLANH-----GK GK  
SQ-SPLHKVYINN--AHSNGG--RSTGPSSLSCSSSY-GHG--ESLSLPSMDP-FLD----EYKEGGG  
YLAGYQLPVKT-----GMENGAASAATVTTVAPSPSQ--LPTLSECLAMPEPVY----GGSEAAAA  
G-----GLQMG-AGLPAELYGGQFGDGF-----  
-----TLQHQMAKS-----DQW--AGD-S-----SLHSMLGS-----  
----VIQTEA-----EQEQDSSLQLV-HLLLACADFSKGDQPSALRHLHLLR  
RVASPLGDS-MQRVASYFADALAARLSLSSNPSSSSSSSGAATPRGGAAAGVAPYTFPPSPE--TLKIYQ  
I-LYQ-----ACPYIKFAHFTANQAI FEA FAGEDRVHVVLDLIL-QG--Y----QWPAFL  
QALA-ARP----GGP----P-TLRLTGVGHPAA-----AVRETGRHLASLAASLRVPFEFHAAAA-DRL  
ERL-RP-----AAL-----QRR-----VGEALAVNAVNRHLHRVP---SAH---LGPLLSMIR  
D-QAPKIMTLVEQEAG--HN-----GPYFLGRFLEALHYYSALFDSLDAT-----

-----FP-----ADS-APRMKVEQCLLAPEIRNVVACEGAERV-AR-HERL-DRWRRLMEGRGFEPVPL  
SPAA-IGQSQVLL--GLYGA-----SD--GYRLT---ED--KGCLLLGWQDRAIIAASAWQC-----  
-----

>Solyc07g065270.1.1

-----MRPSQNPEEINEFN  
KFYNQPIE-----YQESYFLPSVNNPNNNQSFYADVSAKPA-----  
-----QHCVVSSAGNSSELVS-----DSPPIVN----FNPMMNQGS DSC-----RSDMHHS P  
DDT--FQS--SGNSSC---YTS DVTDLKHKLRELE-TAMLG---PDSESLSEFNNTIP--VTAANQVP--  
-----  
----SESDKLVG-----MEMMPSGDLK-EVLIACAKAIAENNLITAEWLMSEL R  
TVVSVCGSP-IQRLGAYMLEGLVARLASSGS-----SIYKALR-----CKEPTSVE--LFSYMH  
L-LYE-----ICPYFKFGYLSANGAIVDAMKDENSIHIIDFQIA-QG--S----QWITLI  
HALA-ARP----GGP----P-RIRITGIDDSTSAYARGGGIEIVGRRLSSIAASCNPFEFH-PVS-ASC  
PDI-EI-----EHL-----KVL-----PGEPLAVNFALVLHHPDES VGTQNHDRDLLRMVK  
S-LSPKIVTLVEQESN--TN-----TAQFFPRFLETLNYYLSVFESIDVA-----  
-----LP-----RDH-KERINVEQHCLAREIVNILACEGAERV-ER-HELL-ERWRSRFVAVAGFKPYPL  
SSSV-NATIKTLL--ENY-----YQ--SYTLN---ER--NGALYLGWMNRDLVASC AWK-----  
-----

>Solyc02g094340.1.1

-----MGSLKNDIIKNEV-----GSEITSFKDQNSYIK-----  
-----LLPEDSLASSESKKVTPISSDFELDCGSLIPTSLTFPPG--G  
GDDDDVEIQSPDNSIWESFFADQLEA-----DFMIS-----  
----SPVRNL-----SSTSTFCTT  
TTTHNNNTYT-----HHNQG-----IHGQSMMMCSPPR-SPLRPNNYNSTNK GK  
GL-SPFQKVF-----NSPNNQFMQIESFNLPALLES-FLDDDLASEYSTLKV  
SDVGS-----SSELSV I PDFLECLALPNSSS--NTSASFMSL  
LSNTSVGQ-----VDDEIFQTGSIAPLSQQ-----  
-----LHQERHHEK-----QOK--QI-P-----THVQLPSTQQQYTQMIN  
HNLVVAAPDQ-----MQEQD SGLQLV-HLLLACAEAVSKEDYMLARRYLHHLN  
RVVTPIGDS-MQRVASC FTEALTARLAATLATKPST--SVPKPFN-----PFPPNSLE--ILKIYQ  
I-LYQ-----ACPYVKFAHFTANQAI FEAFEAEERVHVIDLDIL-QG--Y----QWPAFM  
QALA-ARP----GGA----P-FLRITGVGSYPE-----AVRETGRCLTELAQSLHVPFEFH-PVG-EQL  
EDL-KP-----HMF-----NRR-----IGEALAVNSVNRLHRVP--GNC---IGNLLGMIR  
D-QAPNIVTIVEQEAS--HN-----GPYFLGRFLEALHYYS AIFDSL DAT-----  
-----FP-----GDS-SQRAKLEQYIFGPEIMNIVSCEGMERM-VR-HERL-EKWRRVMEGKGFKGV AL  
SANA-VTQSKILL--GLYS-----CD--GYKLT---ED--NGCLLLGWQDRAIIAASAWRC-----  
-----

>Aco003635.1

-----MGGLKSSG-----TSSVVKQKHPPASPT-----  
-----ASVSESNIVTSSDPEHLQPDQPERND AIAIPE-----LKF  
ELDLGLEVQSPDNAMWDSLFADVAGA-----DFMIE-----  
----SPRRDYMV-----CSPRRDYMA-CSPKRENTI SSPKRTFLM-----

```
---NNNSYSS-----YHNNN-----YAYVSGVHGLFGCTTQT-TYLSPNH----NKGK  
SL-SPLHKVFNYS-----SSSSTSLLPYASSAEFVRGDESLLL PVVDA-FLD-----EYKEGSN  
AEVGFDFVP-----GSAATSALPTLLECLSMPEMNQYGEDAVAAGEAA  
AGAQQGGGE-----GTDHVYQNWELQQ LASC-----  
-----GGELADVAK-----SEW---AD-P-----SYQDVLGA-----  
---IVPPSDT-----EQEQDSGLELV-HLLLACAEAIKDDYLAARRYLHHLH  
RVVSPVGDS-MQRVASC FADALPLPAVPRRPP-----HLPDSLGR-----STRTSR  
I-IYHDIRCTTRWSHILTAVVCPYVKFAHFTANQAI FEA FEGEDRVHVVDLDIL-QG--Y----QWPAFL  
QALA-ARP----GGA----P-SLRITGVGHSAA-----AVSETGRHLAELAHSLRVPFEFHAAAA-GRL  
EDL-RP-----RML-----HRR-----VGEALAVNAVNR LHCVA---APH---LGPLLAMIR  
D-QAPKIVTLVEQEAS--HN-----GPSFLGRFLEALHYYS AIFDSL DAT-----  
-----LP-----GDS-AARMKVEQYLF GPEIRNIVACEGAERM-AR-HERL-ERWRKVM EGGKGFHGVPL  
SANA-VNQS RLLL--GLYTN-----CD--GYRLT---ED--NGCLLLGWQDRALIAASAWRC-----  
-----
```

>Seita.2G369400.1.p

```
-----MADTPTSRMV-HPFGNVPRQTPKQFLYSG  
NTQHLCHP-----YQSASDTHVPEHHYTMK---SHSP-DAVSEEHETR-----  
-----KQYTL DSSAASGCSRH-----DSPSSQSIHTG-----SGSPL--SHEDSHS-  
GSTNGNGS--PVSASC--VT-EDPTDLKQKLDLE-AVMLG---TDSEIVDSLEISVA--NQLS-----  
-----  
----LEPEKWV-----HMMSMPKGNLK-ELLIACARAVEQNSFAIDLMIPELR  
KMVSVSGEP-LERLGAYMVEGLVARLASSGN-----SIYKALK-----CKEPKSSD--LLSYMH  
F-LYE-----ACPYFKFGYMSANGAIAEAVKGEDRIHIIDFHIA-QG--A----QWISLL  
QALA-ARP----GGP----P-FVRITGIDDSV SAYARGG GLELVGRRLSHIAGLYKVPFQFN-AVA- ISG  
NEM-EE-----GHL-----GIV-----PGEAVAVNFTLELHHIPDET VSTANHRDRILRLVK  
S-LSPKVLTLVEQESN--TN-----TAPFAQRFAETLDYYTAIFESIDLA-----  
-----LP-----RED-RERINMEQHCLAREIVNLVACEGEERV-ER-HEVF-GKWKARLMMAGFRPSPL  
SALV-NATIKTLL--QSY-----SP--DYKLA---ER--DGVLYLGWKNRPLIVSSAWH-----  
-----
```

>AT3G54220.1

```
-----MAESGDFNGGQPPPHSPLRRTSSGSSSSNNRGPPPPPP-----  
-----PPLVMVRKRLASEMS----SNPDYN  
NSSRPPRRV-----SHLLDSNYNTVTPQQPPSLT-----  
-----AAATVSSQPNPPLSVC GFSGLPVFPSDR-----  
-----GGRNVMM SVQPM-----DQDSSSSSASPTVWVD A IIRDLIHS-----STSVSIP  
QLIQNVRDII-----FPCNPNLGALLEYRLRSLM-----  
-----  
-LLDPSSSDPSPQTFEPLYQISNN-----PSPPQQQQQHQQQQQ-----QHKPPPPPI  
QQQERENS---STDA-----PP-----QPETVTATVPAVQTNTA  
EALRERKEEIKR-----QKQDEEGLHLL-TLLLQCAEAVSADNLEEANKLLEIS  
QLSTPYGTS-AQRVAAYFSEAMSARLLNSCL-----GIYAALPSRWMPQ----THSL--K--MVSAFQ  
V-FNG-----ISPLVKFSHFTANQAIQEAFEKEDSVHIIDLDIM-QG--L----QWPGLF  
HILA-SRP----GGP----P-HVRLTGLGTSME-----ALQATGKRLSDFADKLG LPPFC-PLA-EKV  
GNL-DT-----ERL-----NVR-----KREAVAVHWLQ--HSLY-DVTGS---DAHTLWLLQ
```

R-LAPKVVTVVEQDLS--H-----AGSFLGRFVEAIHYYSALFDSLGS-----  
-----YG-----EES-EERHVVEQQLLSKEIRNVLAVGGPSR--SG-EVKF-ESWREKMQQCGFKGISL  
AGNA-ATQATLLL--GMF-P-----SD--GYTLV---DD--NGTLKLGWKDLSLLTASAWTPRS-----  
-----

>AT2G01570.1

-----  
-----  
-----MKRDHHQFQGRLSNHGTSSSSSSISKDKMMVMKKEED-----GGGNMD-----DELL-----  
-----AVLGYKVRSSSEMAEVALKLEQLETMMSNVQ-----  
-----

-----ED  
GLSHLATDTV-----HYNPSELYSWLDNMLSELNPPPLPASSNGLDPVLP-----  
-----

-----SPE  
ICGFPASDYDLKVI PGNA-IYQFPAIDSSSSSN-----NQNKRLKSCSSPDSMVTSTSTGTQIGGVI  
GTTVTTTTTTTTAAAGE-----STR-----  
-----SVIL-----VDSQENGVRLV-HALMACAEAIQQNNLTAEALVKQIG

CLAVSQAGA-MRKVATYFAEALARRIYRLSPPQN-----QIDHC--LSDTLQ  
MHFYE-----TCPYLKFAHFTANQAILEAFEGKKRVHVIDFSMN-QG--L---QWPALM  
QALA-LRE----GGP----P-TFRLTGIGPPAP--DNSDHLHEVGCKLAQLAEAIHVEFEYRGFVA-NSL  
ADL-DA-----SML-----ELR-----PSDTEAVAVNSVFELHKLL-GRPGG---IEKVLGVVK  
Q-IKPIVIFTVVEQESN--HN-----GPVFLDRFTESLHYYSTLFDSLEGV-----  
-----PNS-QDKV-MSEVYLGKQICNLVACEGPDRV-ER-HETL-SQWGNRFGSSGLAPAH  
LSNA-FKQASMLL--SVFNS-----GQ--GYRVE---ES--NGCLMLGWHTRPLITTSAWKLSTAA--  
-----

>AT1G50600.1

-----MRLSVFIIPLVESRQASGIINKQSTSLLRFSLYLEASISTKSFFSKS  
QRISQTQSPICLSANYYPDNLDMEATQKHMIQEGSSMFYHQSSVKQMDLSVQ-----  
-----TFDSYCTLESSSGTKSHPCLNKN--NSSSTTSFSSNESPISQANNNL----SRFNNHSP  
EEN--NNS--PLSGSS--ATNTNETELSLMLKDLE-TAMME---PDVDNSYNNQGGFG--QQHG-----  
-----

-----VVSAMYR-----SMEMISRGDLK-GVLYECAKAVENYDLEMTDWLISQLQ  
QMVSVSSEP-VQRLGAYMLEGLVARLASSGS-----SIYKALR-----CKDPTGPE--LLTYMH  
I-LYE-----ACPYFKFGYESANGAIAEAVKNESFVHIIDFQIS-QG--G---QWVSLI  
RALG-ARP----GGP----P-NVRITGIDDPSSFARQGGLELVGQRLGKLAEMCGVPFEFH-GAA-LCC  
TEV-EI-----EKL-----GVR-----NGEALAVNFPLVLHHPDESVTVENHRDRLRLVK  
H-LSPNVVTLVEQEAN--TN-----TAPFLPRFVETMNHYLAVFESIDVK-----  
-----LA-----RDH-KERINVEQHCLAREVVNLIACEGVERE-ER-HEPL-GKWRSRFHMAGFKPYPL  
SSYV-NATIKGLL--ESY-----SE--KYTLE---ER--DGALYLGWKNQPLITSCAWR-----  
-----

>Aco011304.1

-----  
-----  
-----  
-----  
-----

-----MSTSYGDTNLSAR  
KSSSERMQMFISDERFHYRANSYLSDIYAQAYFTNSSRVHTSHREV-----  
-----SSAPYDLMAN-----TRSSII LNTPYNSCFSSAKQPDSLS--SNISHHSS  
QSVLDNRS--SEHEVD-----FTEDDIRLKLQELE-QALLNDNDPDQD-----MGIDEEWV  
EPIKELLV-----  
-----ASS  
PKESSESIIYC-----IGNRKEAQTPK-QLLFDCAAAILEDSEIEEAQAIINELR  
HMVSIQGD P-QORLAAYLVEGLAARIASSGQ-----GLYKALK-----CKEPPTSD--RLSAMQ  
I-LFE-----VCPCFKFGFMAANYAITEAFKGEERVHIIIDFDIN-QG--S----QYITLI  
QSL S-TMS----NNP----P-HLRITGVDDPESVQRAVGGLKIIGQRLEKLAEGCGVPFEFR-AIA-SRT  
EDV-TP-----AML-----DCR-----PGEALLVNFAFQLHHMPDES SVTVNQRDQLLRMVK  
G-LGPKLVTVVEQDVN--TN-----TAPFFPRFVEVYNYYSAVFNSLDAA-----  
-----LP-----RES-ADRMNVEKQCLARDIVNIVACEGADRI-ER-YEAA-GKWRARMTMAGFVSCPF  
NANS-SGSIRSL--KSY-----CD--RYKVK---EE--GGALYFGWEDKTLVVASAWQ-----  
-----

>GRMZM2G106548\_P01

-----  
-----MLQGVLSRAPATD--A--AAAMK-AKRAGASPG-----  
-----  
-----  
-----  
-----  
-----

-----EEE-----EGDGRSAR-G-----KRQQLLGLGPATALASA  
AAAE-----EGPETRGLRLL-SLLLRCAEAVAMDQLTEARELLPEIA  
ELASPGSS-PERVAAYFGDALCARVLSSYL-----GAYSPLA--LRPL---AAQSR--VAFAFQ  
A-YNA-----LSPLVKFSHFTANQAILQALDGEDCLHVIDLDIM-QG--L---QWPGLF  
HILA-SRP---RKP---R-SLRITGLGASLD-----VLEATGRRLADFAASLGLPFEFR-PIE-GKI  
GHVADA-----AALLGSRQ---RRR-----DDEATVVHWMH--HCLY-DVTGS---DVGTVRLLR  
S-LRPKLITIVQDLG--H-----SGDFLGRFVEALHYYSALFDALGDG-----  
-----AGA---AEEES-AERYAVERQLLGAEIRNIVAVGGPKR--TG-EVRV-ERWSHEL RHAGFRPVSL  
AGSP-AAQARLLL--GMY-P-----WK--GYTLV---EE--DACLKLGWKDL SLLTASAWEPADDAAS  
APTG-----

>Pp3c1\_15560V3.1.p

-----MREIGVLEY  
GEMLYTGELDELFR LPAVK TGRSSSPSLPCS NASSQYGLHSQRSELGLSGSPSHRGGMSGNNRVLLPGKF  
VLKKGLEPWSTVERRGEQLSSTDPAGSPSFRRAGTTMWPD-----KTSTACEAETSTGQW-----  
-----TSPRCGEDPRNEGDL-IHFHQHQNSTSNSPLCPGTPIR---  
-----  
-----HHYSQMAPSSPLQI ISSPDVKKCIAPMSEPRSVLDLTISP  
QQHQLP TIRA-----TLPRRFRETFL EHN VAPVTAPSLSPSRV LNFESCSN-GSTKSGTFADQYGPS  
PTNASTWAPDLATQGYPTSIP THKVEELPVLPTAQ SFIQ-ETSS-----  
-----LDEWEAATITSPQHKLRAKQWMVSLMED--LRNAEDANSA  
QETEECTTPFTPGVDSCAPYFLTSQN-----  
-----GLGSPCPSD-----YTGD DTPR-G-----SRLEHLQVESPCGTPRG  
GGDG--EDAQ-----NSPVMVGHELV-TLLIACAEAVSTQSLSLVNHL LQKLG  
EHAS PQGTA-MQRVAAYFTEGLACRVAHLWP-----HVYQPLPT-----HSNLNDEQ--LQTAFH  
L-LNH-----VVPYTKFAHFTVNDIILQAFNGADRVHVIDFDIK-QG--L---QWPALF  
QSLA-ERE---CGP---PSHIRITGIGECKD-----DLLETGDR LAEFAEEFNIPFSFH-AVI-DRL

```
EDV-RL-----WML-----HVK-----ENEAVAVNCISQFHRLLYDSGET---IKDFLNLIG
S-TKPRVVAIVEQEGS--HN-----SPHFEGRFLES�KYYSAlFDSLEAN-----
-----LS-----RES-CVRVQVEQ-LFALEIRNLSCEGAERV-ER-HEDT-ARWSVLLSQSDFVNVPL
EDSA-NTQAQILL--RMFD-----SD--GYTLT---AE--NGSLTLGWVEQPPLTWSAWKPKDFVLT
GKSLVTNEKQAV-----
>Bradi2g22010.1.p
```

```
-----MINH
LMSGRVSDMHHHDSSLGLM-QFHD--PHQYMYSSSSSTA--GGSFLLPHHAAFI-----KDV
APAE-PLVEILE-EAP-----GAAGAPAM-QE-----ERKVVDEAA-----
-----EEEEGEE-----AAAESHGVRMI-ALLMECAVAMSVGNLADANGALLELS
QMASPYAASCGERLVAYFARALAARLMSSWV-----GVCAPLSLQ-----QHDDAGIV--IHAAFR
A-FYN-----VAPFARAAYLACNQAVLDAFRGQRAVHIVDLDMV-PGGAL---QWLSLL
PALA-ARP---GGP---PALLRVTGFGVSAA-----LLHDAGNQLAGLAGKLGPFIFY-AVA-KRP
GDA-AAAVSSGLLLP-----GKR-----PGEAVAVHWLR--HALY-DAAGD---EAAAIRLAR
W-LEPRVMTVVDQERSLSSSSSSGAAADD-----GGSFLLDRFVSALHHYSAAFDSLGA-----
-----RPA-----GDD-ASRHLAENGMLGREIGNVLAIAGPSRS-GRERLLP-GSWQAELARHGFLRARW
GSG--GARAQMLA--GACPA-----GL--GYTVA---DDAHDGTVRLGWKGTPLYAVSTWTWCATTHGH
-----
>Solyc11g011260.1.1
```

```
-----ED
GITHLSTDTV-----HKNPSDMAGWVQSMSSISTN-----
-----FDMCNQENDVLVSGCGSS---SSIIDFSQN
HRTSTISDDDLRAIPGGA-VFNS-----DSNKRHRSTTS-----
--SFSTSSSMVTDSS-----ATR-----
-----PVVL-----VDSQETGVRLV-HTLMACAEAVQENLTLADQLVRHIG
ILAVSQSGA-MRKVATYFAEALARRIYKIYPQDS-----MESS--YTDVLQ
MHFYE-----TCPYLKFAHFTANQAI LEAFTGCNKVHVIDFSLK-QG--M---QWPALM
QALA-LRP---GGP---P-AFRLTGIGPPQP--DNTDALQQVGWKLALAEITIGVEFEFRGFVA-NSL
ADL-DA-----TIL-----DIR-----PSETEAVAINSVFELHRL- SRPGA---IEKVLNSIK
Q-INPKIVTLVEQEAN--HN-----AGVFIDRFNEALHYYSTMFDSLESSGSSSSASPT--
GILPQPP-----VNN-QDLV-MSEVYLGRQICNVVACEGSDRV-ER-HETL-NQWRVRMNSSGFDPVHL
GSNA-FKQASMLL--ALFAG-----GD--GYRVE---EN--DGCLMLGWHTRPLIATSAWKLLPDSGTG
AGEVEL-----
>Brast05G288500.1.p
```

```
-----AFLHHRP-----
-----LDHH-----HQYQQ-----HAAAMVRKRPAPDMD-----
```



```
-----NLPPRRRHVTGDLSDVLA AAAA-----PPAAQQQQQLPTAQLPALPAQL---LPPPT-PFQ-  
-----HHQQQQQAA---EQHHHMDVAAANPGG--AA---ATTAFVDGIIRDIIGSCH--GGGHGVSVA  
QLIHNVREII-----HPCNPALASLLELRLLDLPQP-----  
-----  
-----PPPHP---SLL-----PPVSPP-----PPPPPPALPPDKL-----  
-----PAGSPSPK-----PP-----SAEQA-----AAAAQ  
AAAKDRRESQRR-----KQRDEEGLHLL-TLLLQCAESVNADNLDQAALLEIA  
ELATPFGTS-TQRVAAYFAEAVSARLVTSCL-----GLYAPIPPHS-AA---ASITGGRK-IAAAFQ  
V-FNG-----ISPFVKFSHFTANQAIQEAFEREDRVHIIIDLIM-QG--L---QWPGLF  
HILA-SRP---GGP---P-RVRLTGLGASMD-----ALEATGKRLSDFADTLGLPF EFC-AVA-DKA  
GNL-DP-----DKLLN-GSGGGMVAR-----RREAVAVHWLH--HSLY-DVTGN---DANTLGLIQ  
R-LAPKVVTMVEQDLS--H-----SGSFLARFVEAIHYYSALFDSLDS-----  
-----YG-----EDS-PERHVVEQQLSREIRNVLA VGGPAR--TG-DAK FVGSWRDRLARSGFGPASL  
AGSA-AAQAALLL--GMF-P-----SD--GYTLV---EE--NGALKL GWKDLCLLTASAWRPMVHTTPS  
SSAR-----  
>Pp3c2_20930V3.1.p
```

```
-----MMPPFGSLLEPSTDSRGGPGSFYVKPELGVD AVKKIGMDTPQS  
AFSSYRDAHPLRKPLQHEL SAFGPF AAQQQSSVDASAVN-----VAPILPSVDAHLQLW-----  
-----RPTSRQP VQVKHYLQPTVLQSTTNNFLSKKQSTEVSQQF---  
-----NGMFR-----  
-----STNANAMHSK-----SSDVGSSGLVTGIRD TSDGFVVV SCKQVKCKQECDIASSSF  
SAPPLSRKRS-----HSDLAE EESC DSELVLGIGRSSVSRGGSEFRNSRAS-SPR KSLKSSDTRLDL  
VSADLCLAPPVLAPEYSSSSSQQEV PSSSMLEVQPFGE SSKVSHSRGPY-----  
-----ASPTESHLSFQKIKSQDASRME--GVT CVSQAES  
HPTGSRCCQPVRPLNLN-----EAIKRECD AVE-----  
-----RERDNEESL-----AQRTHHE-G-----VELGLFPGVFAADTG--  
-----KKSETSGLQLV-NLLHDCAEAVSKGKIETATQKLEELY  
SHASLFGDF-MQRVA AFFTEGLAARMVGKDK-----PMYKNLM-----VQSRLDD--YLSAFT  
T-LYK-----VCPYFQFGHFAANQAI LEAVEGRSVVHII DMDLM-QG--L---QWPGFI  
QSLS-ERE---DGP---P-KLKITGIGTSCN-----SLQDTGRRLASFAETYGV PFEFH-AVV-GEL  
EDL-TP-----MEL-----GAK-----PGEAVAVNCVMQLH RLL-NNGDK---LHNFIAGLR  
S-LHPVMLTLTVEQEAN--HN-----TSSFLGRFVEAVHYAAVFDSLDS-----  
-----LP-----LAS-EERAKIEQLYFAQQIKNIVACEGV DRI-ER-HETL-DLWQKRMVTAGFRQLPL  
SSHA-VTQAKLLL--SLSP-----CG--GYRLS---QQ-PGGSISLWQDQCLLSASSWVL-----  
-----  
>Solyc11g012510.1.1
```

```
-----MQTSQRTQMSGSVH  
GLYNQQMQQV-----EQYYAPYDVLKNS-CKDNRSSGMQFSLQAQD-----  
-----EQFFTLDS SPATDYVN-----DSPPALSVSSNRSPFSPQCSQSY-----MSDLHHSS  
DNT--CGS--PLSGCS-----GIDDGDLRHVLRLELE-NKLLG---PESDTDDSCSCSLN--DMVSK-----  
-----  
---PSSVTRWNR-----VLDMAPGLNLK-ELLDACAEAVSDADISTAEALMSALE  
QRVSVSGEP-MERLGAYVLEGIRARLLSSGS-----I IYKCLK-----CKEPTGLE--LLSYMQ  
V-IFN-----MCPYKFA YMSANVVINEAMMNENRIHIIDFQIA-QG--S---QWMFLL
```

HYLA-HRP----GGP----P-FVRITGVDDDESAYARGGGLQLV GKRLAEVAKSCGVPFEFH-GAA-LSG  
CEV-QL-----ENL-----RVK-----HGEALAVNFPYMLHHMPDES SVTINHRDRLRLVK  
S-LSPKIVTLVEQESN--TN-----TAPFLPRFRETLDYYTAMFESIDAA-----  
-----RP-----RDD-KERISAEHCVARVUNI IACEGADRV-ER-HELF-GKWRLRLMMAGFTQCQL  
SPSV-GETIKHML--KEY-----SP--NYRYA---EG--EGALYLGWKNRALATSSAWR-----  
-----

>LOC\_Os12g02870.1

-----MGSSSLLLPSSSSSAT-----HSSYSPSSSSHAITSLLPPLP-----  
-----SDHLLLYLDH-QEQH-H-----LAAAMVRKR PASDMD-----  
-----LPPRRRHVTGDLSDVTAAAAGA-----PTLSASAQLPALPTQL-----P-AFH-  
-----HTDMDLAAP-----APPAP-QQVAAGEGGP-----PSTAWVDGIIRDI IAS-----S-GAAVSVA  
QLIHNVREII-----RPCNPDLASILELRLRSL-----

-----NS  
DP-APPPPPSHP----ALLPPDATAPPPPT-SVAALPPPPPAQ---PDKRRR-----E-----PQC  
QEQEPNQP---QSPK-----PP-----TAEETAAAAAAAAAAAA  
AAAKERKEEQRR-----KQRDEEGLHLL-TLLLQCAESVNADNLDEAHRALLEIA  
ELATPFGTS-TQRVAAYFAEAM SARLVSSCL-----GLYAPLSPS-PA----GARVHGR--VAAAFQ  
V-FNG-----ISPFVKFSHFTANQAIQEAFEREERVHIIDL DIM-QG--L----QWPGLF  
HILA-SRP----GGP----P-RVRLTGLGASME-----ALEATGKRLSDFADTLGLPFEFC-PVA-DKA  
GNL-DP-----EKL-----GVT-----RREAVAVHWLR--HSLY-DVTGS---DSNTLWLIQ  
R-LAPKVVTMVEQDLS--H-----SGSFLARFVEAIHYYSALFDSL DAS-----  
-----YS-----EDS-PERHVVEQQLSREIRNVLAVGGPAR--TG-DVKF-GSWREKLAQSGFRVSSL  
AGSA-AAQAALLL--GMF-P-----SD--GYTLI---EE--NGALKLGWKDLCLLTASAWRPIQAS-GR  
-----

>Sevir.9G121800.1.p

-----MKREYQDA-----GGS--GGDMGSSKDKMMAAV-----AGAGEQDEE-VDELL-----  
-----AALGYKVRSSDMADVAQKLEQLEMAMGM--GGAGAAAD--  
-----DG  
FVSHLATDTV-----HYNPSDLSSWVESMLSELNAPPPPLPPA-----

-----PPAPRLASTSSTVTGGAAAG---GVYFD-LPP  
AVDSSSSTYALKPIPSPA-AASA-----DP-STDSAREP-----  
--KRMRTGGGSTSSSS-----SSSSLDG-G-----RTRSSVVEAAPPAAQAS  
AAASGPAVPVVV-----VDTQEAGIRLV-HALLACAEAVQQENFAAAEALVKQIP  
MLASSQGA-MRKVAAYFGEALARRVYRFRPAPD-----SLLDAA--FADLLH  
AHFYE-----SCPYLKFAHFTANQAI LEAFAGCRRVHVDFGIK-QG--M----QWPALL  
QALA-LRP----GGP----P-SFRLTGVGPPQP--DETDALQQVGWKL AQFAHTIRVDFQYRGLVA-ATL  
ADL-EP-----FML-----QPD-GEDTDEPEVIAVNSVFELHRL L-AQPGA---LEKVLGTVR  
A-VRPRIVTVVEQEAN--HN-----SGSFLDRFTESLHYYSTMFDSLEGAGSGNSA-----  
ADASPAP-----AGG-TDQV-MSEVYLGRQICNVVACEG TERT-ER-HETL-GQWRNRLGRAGFEPVHL  
GSNA-YKQASTLL--ALFAG-----GD--GYRVE---EK--DGCLTLGWHTRPLIATSAWRAAAP-----  
-----

>Brast06G087800.1.p

-----MIQGVLSRASAAD-----AAAMKAAKRAASIP-----



```
I-LYN-----ICPYFKFGYMAANGAIAEALRSEDNIHIIDFQIA-QG--T----QWITLI
QALA-ARP----GGP----P-HVRITGIDDPVSEYARGEGLIIVGNMLKGMSKEFNILEFT-PLP-VYA
TQV-TK-----EML-----EIR-----PGEALAVNFTLQLHHTPDESVDVNNPRDGLLRMVK
G-LSPKVTTLVEQESH--TN-----TTPFMMRFAETMDYYSAMFESIDAN-----
-----LP-----RDN-KERISVEQHCLAKDIVNIIACEGKDRV-ER-HELL-GKWKSRMTMAGFKPYPL
SSYV-NSVIKLL--ACY-----SD--KYTLE---EK--DGAMLLGWKKRKLISASAWH-----
-----
```

>Bradilg25370.1.p

```
-----MDLHQLLKYRLTGANVLYEIPTENNLTNSSWPA-----
-----SPLKLEYNNSPYTPLSTQLECDNLSALSNTPDNQ-SSTETISAQ---PISPLEADSSYIQPG
SHLRENIQVRADPLYA----RSRHMQHALREIE-TVLMA---PDADDATTSKHEFEETKPAQLMRQR
SRTWSHESRQ-----
-----PLPGVVRPQFASGGYPM
ASYEFRPEKRQR-----ELRDDPQIIVK-QLLTKCAEALSEDRTEEFLKLVQEAR
GIVSINGEP-IQRLGAYLLEGLVARHGNSGR-----NIYRALR-----CRKPESKE--LLSYMK
I-LYN-----ICPYFKFGYMAANGAIAEALRSEDNIHIIDFQIA-QG--T----QWITLI
QALA-ARP----GGP----P-HVRITGIDDPVSEYARGEGLIIVGNMLKGMSKEFNILEFT-PLP-VYA
TQV-TK-----EML-----EIR-----PGEALAVNFTLQLHHTPDESVDVNNPRDGLLRMVK
G-LSPKVTTLVEQESH--TN-----TTPFMMRFAETMDYYSAMFESIDAN-----
-----LP-----RDN-KERISVEQHCLAKDIVNIIACEGKDRV-ER-HELL-GKWKSRMTMAGFKPYPL
SSYV-NSVIKLL--ACY-----SD--KYTLE---EK--DGAMLLGWKKRKLISASAWH-----
-----
```

>Solyc04g014830.1.1

```
-----MQASQGPQRSCSVH
KLYNKPMQQV-----QQNYTPCRASDNSNYNDGSNSQAQVSLTTEN-----
-----EKFFTVDTFPATDCAIY-----DGDPVSVSVSSNRSPFSSQCSQSN-----MFEQRRSY
EKT--AGS--PVSLCS---GVDDSNKHELRELN-NKLLR---PESDIDDCSCCSLN--GVVSK-----
-----
---HFSLTRRNQ-----VLDVASRLDLK-ELLVACAEAVDEADTSTAENVLMDALE
KRVSVEGEP-MQRLSAYMLEGLRARLLSSGS-----NIYKCLK-----CNEPTSSE--LLSYMQ
V-LYH-----ITPYFKFAYMSANVISEAMKNENRIHIIDFQIA-QG--S----QWVFLI
HYLA-RRP----GGP----P-FLRITGIDDSQSAHARGGGLQLVGERLASIAKSCGVPF EFH-TAA-LSG
CMV-KL-----ENL-----RVR-----HGESLAVNFPYMLHHPDESVMNHRDRLLRLVK
S-LSPKIVALVEQEMN--TN-----TAPFLPRFRETLDYHKAI FESVDVT-----
-----RP-----RND-MQIRIRSEEHCARDVVNLIACEGADRV-ER-HEVF-GKWRSRLLMAGFTPCPL
SPSV-AEAIKVML--KEY-----SS--NYKLA---ES--QGALYIGWNNRALATSSAWQLPHSLPLG
S-----
```

>Aco009099.1

-----  
-----  
-----  
-----  
-----  
-----MDLHQLLKYGLTASDHSCEFPAPRTPAYSDWSA-----  
-----NSIKFNLGNSPHSPLLTLQDSDNLSVYSSSISKQRSPIESLSGNIHSQHSPLPQSSLRQFQ  
IKFSEFTE--PNSQNT-----ITSQNMRRHALQELE-TVLMA---PDTDEGATSTNPNTDEHKPAKVARQL  
SRTWSHESRR-----  
-----EPIIMVQPQFTSNRYPV  
QSFEVRPEKRPR-----EMKEDPQNKVK-QLLIKCAEALSENKIEEFDALVQEAH  
GMVSI SGEP-IQRLGAYLIEGLVARKESST-----NIYRALK-----CREPESTE--LLSYMR  
T-LYD-----ICPFYKFGYMAANGAIAEALRSEDRIHIIDFQIA-QG--T----QWITLI  
QALA-ARP----GGP----P-HVRITGIDDPLESEYARGDGLQLVGKMLSDMSKKFNIPLEFT-GLP-VYC  
PQV-TR-----EML-----DIR-----PGEALAVNFTLHLHHTPDESVDVSNPRDGLLRMVK  
G-LSPKVTTLVEQESN--TN-----TTPFLTRFLETLDYYYAMFESIDVT-----  
-----LP-----RDS-KERISVEQHCLAKDIVNIIACEGDGRV-ER-HELL-GKWSRSLTMAGFKPYPL  
SSYV-NSVIKLL--GFY-----SD--KYTLV---EK--DGAMLLGWKNRSLISASAWH-----  
-----

>GRMZM2G116638\_P01

-----  
-----  
-----  
-----  
-----  
-----MSARDSNHSYKCS  
DSQMPYYNNS--AP---VGENGRIHMAENSLGHYSSSDIGSQRINNSNPQVFE-----  
-----AQYCTLESSANGVYPAQ-----SSTSSHSISPL-----SGSPL--SQHDSH-  
DHT--YSS--PPSASC---LTEVADLLIKQKELE-NSIVG---PGLDISSDCSRLL--QAHVP-----  
-----

-----VRPDNR-----QLLINGGDLM-QVVIACGKAVAENDVFATELLISEL  
HLVSVSGDP-MQRLGAYMLEGIVARLSSSGS-----MLYKSLK-----CKEPTSSE--LMSYMH  
L-LYE-----ICPFYKFGYMSANGAIAEAIKGENFVHIIDFQIA-QG--S----QWVTL  
QALA-ARP----GGP----P-YIRITGIDDSNSAYARGGLDIVGRTLCDVANSCLPFEFN-AVP-AAS  
HEV-EL-----QHL-----AIR-----HGEIIAVNFAYQLHHVPDESSTENHRDRIIRMIK  
S-INPRVVTLVEQESN--TN-----TAPFFPRYMETLNYYTAMFESIDVA-----  
-----LP-----RDD-RRRMSAEQHCVARDIVNLIACEGAERV-ER-HELF-GKWKSRFAMAGFRPYPL  
SSVW-NNTINTLL--HTY-----NS--YYRLE---ER--DGVLYLGWKNRVLVSSAWC-----  
-----

>Bradi4g44093.1.p

-----MGS--LFFPSSS-----SSSYPPSHASDS-----TAFLHHL-----  
-----LDHH-----QH-----AAAAMVRKRPAPDMD-----  
-----NLPPRRHVTDGLSDVLAANAA---APPQQQQQLPTAQLPALPTQL---LPPPT-PFQ-  
-----HQHQHQ-----EQQHMDVAAANPGG--VA---ATTAFVDGIIRDIIGSCHAGHGGGVSVA  
QLIHNVREII-----HPCNPALASLLELRLRSLSP-----  
-----  
-----AASDLPPHP-----SLQ-----SLPVSPAAALPPPPP-----PPDKL-----  
-----ISSPPPQEPSPKQPPPP-----TPEQT-----AAAAQ  
AAAKSRRETQLR-----KQRDEEGLHLL-TLLLQCAESVNADNLDDAQSALLEIA

ELATPFGTS-TQRVAAYFAEAVSARLVTSCLE-----GLYAPLPPHS-AA----ASITGGRK-IAAAFQ  
V-FNG-----ISPFVKFSHFTANQAIQEAFEREDRVHIIDLDM-QG--L----QWPGLF  
HILA-SRP----GGP----P-RVRLTGLGASMD-----ALEATGKRLSDFADTLGLPFEFC-AVA-DKA  
GNL-DP-----EKLLNGGGGGGGVGR-----RREAVAVHWLH--HSLY-DVTGN---DANTLGLIQ  
R-LAPKVVMTMVEQDLS--H-----SGSFLARFVEAIHYYSALFDSLDS-----  
-----YG-----EDS-PERHVVEQQLSREIRNVLAVGGPAR--TG-DAKFVGSWRDKLARSFGFPASL  
AGSA-AAQAALLL--GMF-P-----SD--GYTLV---EE--NGALKLWKDLCLLTASAWRPMVQTTPS  
SSAR-----

>Pp3c1\_15680V3.1.p

-----  
-----MMPPFGSLEPPTNLRGQSSFYVKQEPGVDSVRKLRMDTPQS  
AFSSYRDTHPTLRKPLQHELSAFGPFSAQGOSSMDASTN-----AAPHPPSGDTHTSR-----  
-----KSASRQPIQVHQYLRPAVLQPTTSVSPSKKQCTEKSQF---  
-----NDVFL-----  
-----SAHTNAMPSK-----SSDVGSSGLATGIRDTTSDGFVVVSCQMCKQECDIASTSF  
SAPPLSRKRS-----HSELA-EESCDSELVLGVGGRSSVSREGSEYRNSRAS-SPRKSQKSSDTRLDL  
VSADLCLAPPIVAPEYSSSSSQQEAPSSSMLETQPLGESSKVSHSRGT-----  
-----VSPTQSHLSFQKIKSKDVSRAE--GVTCISQAES  
HPTGSRCQPVRPLLNL-----EVIKRECDAVE-----  
-----RERDNEESL-----AQRNHHE-G-----FELGLFPGVFAADQG--  
-----KKSEASGLQLV-HLLLACADAISKNKIEIATQKLEELY  
SHASLFGDS-MQRIAAFFTEALAARIVGKDN-----PAYKNLM-----LQSHLDD--YLSAFT  
T-LYK-----ICPYFQFGHFTANQAI LEAVEGYSVVHIIDMDLM-QG--F----QWPGFI  
QSLS-ERE----GGP----P-KLKITGVGTSC-----SLQDTGRRLAFAETYGVPFEFH-AVV-GEL  
EDL-SP-----MEL-----GAK-----PGEAVAVNCVMQLHRL--NNGDK---LQNFISGLR  
S-IHPVMLTLVEQEAN--HN-----TSSFMGRFVEALHYAAVFDSLSS-----  
-----LP-----LAS-EERAKIEQLYFAQIQKNIVACEGADRI-ER-HETL-ELWQKRMKLAGFRQWPL  
SSHS-VTQAKLLL--SLSP-----CD--GYCLS---QQ-PGGSISLNWQDRSLLTASTWVL-----  
-----

>Sobic.008G023401.1.p

-----  
-----MVRKRPAPDVD-----  
-----  
-----LPPPRRHVTGDLSDVTAGAGA--AGAPPHLPPFSASAQLPALPTQLPTAYQFQAHAHQ-  
-----HQAGVDVP-----AAHAQ-AAEVAAAAPSTTAWVDGIIRDIIGS-----SGGAGVSV  
QLIHNVREII-----HPCNPGLASLLELRLRSLLA-----

-----PA  
DP-APLHPP-----LL--H--AAPHVAALPPAPPPPP-----LHSAEKH-----C---PPPPQ  
QDQEPNPPAPSQSPK-----AP-----TAEET-----AA  
AAAKERKEEPR-----RQRDEEGLHLL-TLLLQCAEAVNADNLDDAHRCLLEIA  
ELATPFGTS-THRVAAYFAEAMSARLVTSCLE-----GIYAPLPPGN-PV----AARLHGRGVAAAAFQ  
V-FNG-----ISPFVKFSHFTANQAIQEAFEREDRVHIIDLDM-QG--L----QWPGLF  
HILA-SRP----GGP----P-RVRLTGLGASMD-----ALQATGKRLSDFADTLGLPFEFC-AVA-EKA  
GNV-DP-----EKL-----GVT-----RREAVAVHWLH--HSLY-DVTGS---DSNTLWLIQ  
R-LAPKVVMTMVEQDLS--Q-----SGSFLARFVEAIHYYSALFDSLDS-----  
-----YG-----EDS-PERHVVEQQLSREIRNVLAVGGPAR--TG-DVKFVGSWREKLAQSGFRAASL  
AGGA-AAQASLLL--GMF-P-----SD--GYTLV---EE--NGALKLWKDLCLLTASAWRPIHQAPCR  
-----

>Sobic.005G123000.1.p









```
CPGK-DVPEFVD-QA-----AAEVSC-E-----QELAVSKEVSEGGGDGA
--VEEQNNGAAT-----TAARGEAAAHGVRMI-ALLMECAVAVSVGNLADANGMLLELA
QMASPYAPSCGERLVAYFTKAMAARLMSSWV-----GICAPLA-----PPFAA--VHAAFR
A-FYN-----VSPLARFAYLACNQGILEAFHGKCLVHIVDLDVV-PGGAL----QWLSLL
PALA-ARP----GGP----P-VLRVTGFGMSAS-----ALHDTGNQLAGLASKLGVPFYFY-AVA-RRP
GD--DADAAAA-AVP-----SRR-----PGEALAVHWLR--HALY-DAAGD---DGATMRLVR
W-LEPKVLTTLVEQERG--APGDGGGGAGN----ERGHFLDRFVSALHHYSALFDSLGS-----
-----RPA-----DED-ASRHLVEHGVLGREIGNVLAVGGPSR--SG-RDKF-GCWQTELARHGFLRAGG
-----GGRAQLVA--GACPA-----GL--GYTVA---DD-QDGTVRLGWKGTPLYAVSTWTWCPSPHAQ
R-----
```

>Seita.2G356700.1.p

```
-----MLQGVLSRAPATDAAA--AAAMK-AKRAPVSPD-----
```

```
-----EKG-----DGDGCPAR-G-----KRQQLLGLGP-----A
AAAE-----EGPETRGLRLL-SLLLRCAEAVAMDQLTEARELLPEIG
ELASPFSS-PERVAAYFGDALCARVLSSYL-----GAYSPLA--LRPL----AAQSR--VAGAFQ
S-YNA-----LSPLVKFSHFTANQAILQALDGEDRLHVIDLDIM-QG--L----QWPGLF
HILA-SRP----RKP----R-SIRITGLGASLD-----VLEATGRRLADFATSLGLPFYFY-PIE-GKI
GHVADA-----AALLGPRHH----HQQ-----QDEATVVHWMH--HCLY-DVTGS---DVGTVRLLR
T-LRPKLITIVEQDLG--H-----SGDFLGRFVEALHYYSALFDALGDG-----
-----AGA--AEEEE-AERHAVERQLLGAEIRNIVAVGGPKR--TG-EVRV-ERWDELRRAGFRPVSL
AGSP-ATQARLLL--GMY-P-----WK--GYTLV---EE--DACLKLGWKDLSSLTASAWEPADDDTVA
AAPTPRHGSQET-----
```

>Brast08G081600.1.p

```
-----MQFHDHHQHQYLYSSSSGS---AGPFLPHHAAFIQADEGRCAGSGKDV
AQGE-SLVEILD-EAP-----AG---AV-EE-----RKGAVDHEAAAAE-----
-----EEEEEE-----ESAEAHGVRMI-ALLMECAVAVSVGNLADANGALLELS
QTASPYAASCGERLVAFARALAAARLMSSWV-----GVLAPLPPQ-----HAAAGISG--IHAAFR
A-MYN-----VSPFARAAYLACNQAVLDAFRGQRVVHVVDMDVV-PGGAL----QWLSLL
PALA-ARP----GGP----PALLRVTGFGASPG-----PLHDAGSQLAGLAGLGLPFYFY-AVP-KRP
GDA-GLP-----LLP-----GKR-----PGEAVAVHWLR--HALY-DAAGD---EAAAMRLAR
W-LEPRVMTVVDQAQAQPERPSSSSSSPS-----AGGFLDRFVCALHHYSAVFDALGAA-----
-----RPA-----GGD-ASRHAEVGVLGREIGNVLAVAGPSRS--GRRREAG-AGWQAEELARHGFLRARW
GAG--GARARMLA--GACPA-----GL--GYTVA---DD-HDGTVRLGWKGTPLYAVSTWTWCATTTTH
GHVRGFD-----
```

```
>Pp3c19_18560V3.1.p
MALVCPNPRERLGLVTKEPTGVGSRTHYVGFPGYRDQLRMTDNLDRDPFHSGPETGGRDPQDAERRGELQ
EHRVHLPDLDFGVGAKWNCTGQISSWSSYDSTSQSFPSTSAAGWVVSPLGSNNSPFPDGSFSDHLSGL
SNTSFPGALPASLQVQSGGSAGGFFSGSTQTASCNGNQLY-----QNPPSLMNAAPRDSW-----
-----GKI--EDAPSPHHQLSCQYDMEQHGNYGYGVQPAREAVK---
-----DHFSGMDEDSVAAWVDGMIMEMMEA-----MPGVPIE
QILTNLSEVL-----APSNSQLERIIGSRVQSLYGGAGLRVQTFLHTGPSRF-GKRTR-----EGQ
IGWRNAKSSQNEARAY-----QDTPSHHHVRPDNFMEQNAV---ASLARDELHY
P-----RPQKRTIDNLQLSLEPADERSLRHLHTAQQPMPEDQYSHQVLRSDQTTKPVQHQHYFQPHLQ
HQQQKSGEIQNDFSPP-----SNAAQYPI-L-----NTRGFNDAVSLPQNVPQ
STPRNAQPEPP-----NATDEEGLQLL-ALLLQCAEAVSSDDFDQANSILPQLS
ELATPYGTS-VQRVVAYFAEGMASRLVITYCL-----GICPPLSSK-----QLVSNQS--FLSAMQ
V-FNE-----ICPFVKFSHFTANQAI FDAFEGMFMNVHVIDIDIM-HG--L----QWPPLF
QLLA-SRP----GGP----P-HVHITGLGTSIE-----TLEAT-----
-----DAVAVHWMH--HSLY-DVTGS---DLNTLNLLIE
K-LNPKVITLVEQDLR--H-----GGTFLSRFVEALHYYSALFDSLGS-----
-----YK-----ADS-PERHMVEQQLLSCEIKNILAFGGPAR--TG-EAKF-DQWRDELGKR-FKPVSL
SGKA-AHQAAALLL-QGLF-P-----CE--GYTLL---EH--RGTCLKGWKDLYLFTASAWTNE-----
-----
>Sevir.2G367700.1.p
```

```
-----MLQGVLSRAPATDAAA--AAAMK-AKRAPVSPD-----
-----EKG-----DGDGCPAR-G-----KRQQLLGLGP-----A
AAAE-----EGPETRGLRLL-SLLLRCAEAVAMDQLTEARELLPEIG
ELASPGSS-PERVAAYFGDALCARVLSSYL-----GAYSPLA--LRPL----AAQSRR--VAGAFQ
S-YNA-----LSPLVKFSHFTANQAILQALDGEDRLHVIDLDIM-QG--L----QWPGLF
HILA-SRP----RKP----R-SIRITGLGASLD-----VLEATGRRLADFATSLGLPFEFH-PIE-GKI
GHVADA-----AALLGPRHH----HHQ-----QDEATVVHWMH--HCLY-DVTGS---DVGTVRLLR
T-LRPKLITIVEQDLG--H-----SGDFLGRFVEALHYYSALFDALGDG-----
-----AGA--AEEEEA-AERHAVERQLLGAEIRNIVAVGGPKR--TG-EVRV-ERWSDELRRAGFRPVSL
AGSP-ATQARLLL--GMY-P-----WK--GYTLV---EE--DACLKLGWKDLSSLTASAWEPADDDTVA
AAPTPRHGSQET-----
>GRMZM2G037286_P01
```

```
-----MQDSLSLM-QFHD--PYLYGGSAGSASLPL-PHPFLPQHHQGFVHG-----  
CTSK-GVAEFVDPEA-----TAEVGG-E-----QGFVSKVSEGGGDGA  
--VEVEERNDAA-----TTARGEAAAHGVRMI-ALLMESAVAVSVGNLADANGMLLELA  
QMASPYASSCGERLVAYFTKALAARLMSSWV-----GICAPLA-----PPCAA--VHAAFR  
A-FYN-----VSPLARFAYLACNQAI LEAFHGKRLVHIVDL DVV-PGGAL----QWLSLL  
PALA-ARP----GGP----P-VLRVTGFGISRS-----ALHDTGNQLAGLASKLSMPFEFY-AIA-RRP  
GDA-VVGAAAA-DMP-----SRR-----PGEALAVHWLR--HALY-DAAGD---DAATMQLVR  
W-LEPKVLTLLVEQERG--SPGDGGAGAGAAGHDEHGHFLDRFVSALHHYSAMFDSL GAS-----  
-----RPS-----DED-ASRHLVEQVGLGREIGNVLAVGGPSR--SG-RGKF-GCWQAELDRLGFLRAGG  
-----GGRAQLVA--GACPA-----GL--GYTVA---DD-QDGTVRLGWKGTPLYAVSTWAWCPSPHAQ  
R-----  
>Sobic.001G120900.1.p
```

```
-----  
-----  
--MKREYQDA-----GGS--GGDMGSSKDKMMVAA-----AGAGEQEEE-LDEML-----  
-----ASLGKVRSSDMADVAQKLEQLEMAMGMGGVGGAGATAD-----  
-----  
-----DG  
FISHLATDTV-----HYNPSDLSSWLESMLSELNAPPPPLPPA-----  
-----  
-----TTPPAPRLASTSSTVTSGAAAG---AGYFD-LPP  
AVDSSSSTYALKPIPSVAVASA-----DPSSTDSTREP-----  
--KRMRTGGGSTSSSS-----SSSSSMDG-G-----RTRSSVVEAAPPATQAP  
AAANGPAVPVVV-----MDTQEAGIRLV-HALLACAEAVQQENFSAADALVKQIP  
MLASSQGGA-MRKVAAYFGEALARRVYRFRPTPD-----TSLLDAA--VADFLH  
AHFYE-----SCPYLKFAHFTANQAI LEAFAGCRRVHVDFGIK-QG--L----QWPALL  
QALA-LRP----GGP----P-SFRLTGVGPPQH--DETDALQQVGWKLQFAHTIRVDFQYRGLVA-ATL  
ADL-EP-----FML-----QPE-GDDKDEEPEVIAVNSVFELHRL--AQPGA---LEKVLGTVR  
A-VRPRIVTVVEQEAN--HN-----SGTFLDRFTESLHYSTMFDSLEGAGSGQS-----  
TDASPAA-----AGG-TDQV-MSEVYLGRQICNVVACEGAERT-ER-HETL-SQWRGRLVSGFEPVHL  
GSNA-YKQASTLL--ALFNG-----GD--GYRVE---EK--DGCLTLGWHTRPLIATSAWRLAAP-----  
-----  
>Pp3c6_16410V3.1.p
```

```
-----  
-----  
-----MQLFVPPLR  
MRVHSHNFSR-----PQLSLRFPGGLHEMLGSVGSNASASSEPVPEVSSPHRTYGYVD-----  
-----  
-----  
-----  
-----CSNSLGGLMLLRDILVDTAQYISQCDWERARPLLQVLR  
RQVSSTGDS-SERVASCFFEALATRF SRVSGT-----EINELLSSP-----TQEPSSEE--ILSAFL  
A-LNQ-----VTPFMRFAHLTANQALLEALTGEDFVHIVDL DIG-HG--V----QWPFFM  
QALA-DIR----GEEGHTIQ-HLRITGVGKDRE-----MLDRTGTRLAEFAQSIQLPFEFT-PLV-QAP  
ENL-IP-----SMF-----GLR-----IGEAVAFNCMLQLHQLLAKGSEK---LTSFLYMLE  
S-LTPRVVTLAELEAS--HN-----QPHFLDRFAEALNHYSTLFDSL DAT-----  
-----LP-----PTS-PERIRVEQTWYKMEI INIVACDGTERT-VR-HQRC-EQWRRFFERAGFQLLPT  
SRFA-TSQARLLL--RLHYP-----CD--GYRLV---EDVEDGCLLLGWQDRPLFCVSSWHPSNM-----
```



-----MDNVRGSIMLQ---PLPEIAESIDDAIC--HELS-----  
-----  
-----  
-MWPDDAKDLLL-----IVEAISRGDLK-LVLVACAKAVSENNLLMARWCMGELR  
GMVSI SGEP-IQRLGAYMLEGLVARLAASGS-----SIYKSLQ-----SREPESYE--FLSYVY  
V-LHE-----VCPYFKFGYMSANGAIAEAMKDEERIHIIDFQIG-QG--S----QWIALI  
QAFA-ARP----GGA----P-NIRITGVGD-----GSLVTVKRRLEKLAKKFDVPPFRFN-AVS-RPS  
CEV-EV-----ENL-----DVR-----DGEALGVNFAYMLHHLPPDESVS MENHRDRLLRMVK  
S-LSPKVVTLVEQECN--TN-----TSPFLPRFLETLSYYTAMFESIDVM-----  
-----LP-----RNH-KERINIEQHCMARDVVNI IACEGAERI-ER-HELL-GKWKS RFSMAGFEPYPL  
SSII-SATIRALL--RDY-----SN--GYAIE---ER--DGALYLGWMDRILVSSCAWK-----  
-----

>Pp3c2\_30770V3.1.p

-----MSVQYEPGLSMVLT PGFPPGKEREYFSDTANSQQAPNYFGARTSYANDHRQNA YGLKI  
KSHGSPISPLS-----PQDSSHAASDNGQRMSSGGWNSASYQSESSSHSDTSLE-----GH  
VKQEEADYYGRQYGHIEQSEGLAYH-----NSPSSVLKMPYPGAI AQGYS-----MPNYQQDG  
RHVPDGGQYAQSQSNCA-----QRNPEMVHMLQVLE-NALLD-----DDDDDD-----HRAPEGNWA  
DTIEKFLAADNSAIKPSPVTSRTTQ-----  
-----PDYGKQOCNENAINFTG  
AVTARVEELALQ-----KLVVATRSRSE-QLLVACAEAVSNNDMPLANVLI AQLN  
QEVSIHGDP-MQRLAAYMVEGLVARVAASGK-----SIYTSLK-----CKEPPTRD--LLSAMQ  
I-LYE-----VCPYFKFGYMAANGAIAEAFQNESRVHIIDFQIA-QG--T----QWTTLI  
RALA-ARP----GGP----P-HVRITGIDDPMPGPTPNVGVEMV GKRLANLAEAVGVFVFH-PVA-KKG  
TEI-EA-----WML-----ERQ-----QGEALAVNFALQLHHPDES VCTS NPRDRMLHMIK  
G-LNPKVMTLVEQESN--TN-----TAPFFPRFLEALSYYSAIFESLDIT-----  
-----LA-----RES-KERVNVEQQCLARDIVNI IACEGIDRV-ER-HEMM-GKWRARLTMAGFRPYPL  
SQTV-NNTIKTLL--ESY-----SD--KYRLK---EE--GGALFLGWKNRPLIVSSAWH-----  
-----

>GRMZM2G024973\_P01

---MKREYQNA-----GGN--DGYRGSSKDKSMAAA-----AGAGEQEEE-VDELL-----  
-----AALGYKVRSSDMADVAQKLEQLEMAMGM---GGACPTAD---  
-----  
-----DG  
FVSHLATDTV-----HYNPSDLSSWVESMLSELNAPPPLPPA-----  
-----  
-----TPAPRLASTSSTVTSGAAAG---AGYFD-LPP  
AVDSSSSTYALKPIPSVAAASA-----DP-SPDSAREP-----  
--KRMRTGGGSTSSSS-----SSSSMDG-G-----RTRSSVVEAAPPATQ--  
-AANGPAVPVVV-----VDTQEAGIRLV-HALLACAEAVQQENFSAADALVKQIP  
VLASSQGA-MRKVAAYFGEALARRVYRLRPAPD-----GSLLDAA--FADLLH  
AHFYE-----SCPYLKFAHFTANQAILEAFAGCRRVHVDFGIK-QG--M----QWPALL  
QALA-LRP----GGP----P-SFRLTG VGGPPQP--DETDALQQVGWKL AQFAHTIRVDFQYRGLVA-ATL  
ADL-EP-----FML-----RPEGGGDTDDEPEVI AVNSVCELHRL- AQPGT---LDKVLGTVR  
A-VRPRIVTVVEQEAN--HN-----SGTFLDRFTESLHYSTMFDSLEGAGSGSGSGSGSG  
QPTDASP-----PAG-TDQV-MSEVYLGRQICNIVACEGAERT-ER-HETL-VQWRGRLGGSGFEPVHL

GSNA-YKQASTLL--ALFAG-----GD--GYRVE---EK--DGCLTLGWHTRPLIATSAWRVAAP-----  
-----

>Seita.7G305500.1.p

-----MGSSSLLLFPSSSSAASAA-----YSHATA--STSSHSSLLPPLP-----  
-SSSSSPQ----DHLLQYLHHLDDQQH-Q-----ESAAMVRKRPAPDMD-----  
-----

-----LPPRRRHVTGDLSDVTAAAASG-GGAPPPQ--SAAASAQLPALPTQL---HL--P-AFQV  
QHSHHHHHHA-EVDAP-----PAGEVAA---STTAWVDGIIRDIIGS----SGGAGVSVA  
QLIHNVREII-----HPCNPGLASLLELRLRSLN-----  
-----

-----AA  
DPAAPLHQPLPHP-----PALP-PVPALPPPPPPQLTVTDKRRH-----E-----PQ  
QAGEPTNPSPPQEEPK-----PP-----TAEETAAAAAAAAAAAA  
AAAKERKEEQRR-----KQRDEEGLHLL-TLLLQCAESVNADNLDDAHQTLLEIA  
ELATPFGTS-TQRVAAYFAEAMSARLVSSCL-----GLYAPLPPAS-PA----AARLHGR--VAAAFQ  
V-FNG-----ISPFVKFSHFTANQAIQEAFAFEREERVHIIDLDM-QG--L----QWPGLF  
HILA-SRP----GGP----P-RVRLTGLGASME-----ALQATGKRLSDFADTLGLPFEFC-AVA-EKA  
GNV-DP-----EKL-----GVT-----RREAVAVHWLH--HSLY-DVTGS---DSNTLWLIQ  
R-LAPKVVMTMVEQDLS--H-----SGSFLARFVEAIHYYSALFDSLDS-----  
-----YG-----EDS-PERHVVEQQLSREIRNVLAVGGPAR--TG-DVKF-GSWREKLAQSGFRSASL  
AGSA-AAQASLLL--GMF-P-----SD--GYTLV---EE--NGALKLGWKDLCLLTASAWRPIQTP-CR  
-----

>Brast10G114300.1.p

-----MCSRMGTVNCPDTS-----SVKLQ-QQQGPTSPT-----  
-----ASFSESNIVAS-----STDPDAIDALAGLQALRFD-----  
GDI-DGEIQSPDLAMWESLFADQIGAS--GADFLMS-SPRRDFSP-----LRDFMVS-----  
-----SPKRDMV-----SSPKRDYMM-SSPKR-DYMMSSPKRDYMVSSPKREMGVSSPR  
RSTFSNLYSS-----TINQA-----NQSYMHSMEG-----SPQMZY-SNLASHG----NKGK  
SSPSPLHKVYINNINAHSNS--KSNPSSLSCSSSY-THG--ENLPLPSMDP-FLE----EYKEGYL  
---AYQLPEKA-----GGSESAGTT----APISSQ-LPTLSECLAMPEPGY----GGDVEAA  
AAMVGR-GIQVGGGLQPPDHLYYAGQFGAAE-----ESLS-----  
-----SLQHMAKP-----EQW--ADS-S-----SLHSMLGS-----  
-----VIQSEAHQ-----QQDQDQSGLQLV-HLLACADDFVSKGDQASALRHLHLR  
RVASPLGDS-MQRVASYFADALAARLSLT-----CPSAVVSPGGAPFPFPSPD--TLKIYQ  
I-LYQ-----ACPYIKFAHFTANQAI FEAFOGDDRHHVVDLDIL-QG--Y----QWPAFL  
QALA-ARP----GGP----P-TLRLTGVGHPAA-----AVRETGRHLASLAASLRVPFEFHAAVA-DKL  
ERL-RP-----ATL-----QRR-----VGEALAVNAVNRHRVP---GAH---LAPLLSMIR  
D-QAPKIMTLVEQEAG--HN-----GPYFLGRFLEALHYYSALFDSLDT-----  
-----FP-----ADS-APRMKVEQCLLAPEIRNVVACEGAERV-AR-HERL-DRWRRIMEGRGFEAVPL  
SPAA-VGQSQVLL--GLYGA-----GD--GYRLN---ED--KGCLLLGWQDRAIIGASAWRC-----  
-----

>Brast06G075300.1.p

-----MANTPTSRMM-HPFGSVPRQNLKQFQYSD  
NAQHPYHP-----YQSSPDTHVVPQHDYSLK----SHSP-DAGFENQVTH-----

-----MKYTLDSSAAVGCMRH-----DSPSSHSFTPRSD-----SGSPL--SQEDSHS-  
DST--NGS--PVSASCVTVT-EDPNDLRQKLDLE-AVMLG---PDSEAVNSLESSIA--NQLS-----  
-----  
-----LEPEKWV-----QMMRFPRDNLK-ELLVACARAVEEKNSYAIDMMIPELR  
KMVSVSGEP-IQRLGAYMVEGLVARLASSGH-----SIYKALK-----CKEPKSSD--LLSYMH  
F-LYE-----ACPYFKFGYMSANGAIAEAVKGEDRIHIIDFHIS-QG--A----QWISLL  
QALA-ARP----GGP----P-TVKITGIDDSVSAYARDGGLDIVGRRLSHIAGLCKVPFEFH-AVA-ICG  
DEV-EE-----GHL-----GVI-----PGEALAVNFTLELHHISDETSTANHRDRILRLVK  
S-LSPNVLTLVEQESN--TN-----TAPFVQRFAETLDYYTAIFESIDLT-----  
-----LP-----RDD-KERINMEQHCLAREIVNLVACEGSEV-ER-HEVF-GKWKARLMMAGFRPSPL  
SSLV-NDTIRALL--QSY-----SV--NYQLA---ER--DGVLYLGWKNRPLVSSAWH-----  
-----

>Aco031731.1

-----MY-KLNIFC-----  
-----VYSPLIHHHKPL---VTSHHNR--IFNAFQ  
V-YNS-----ISPLVKFSHFTSNQAI FQALDGEERVHIIDLDIM-QG--L---QWPGLF  
QILA-SRP---LKL---R-SLRITGLGSSLE-----LLEATGRRLSDFAAALGLPFEFQ-PVE-GKI  
GDQSKAGGGG--GAF-A-----PRD-----GREVAVVHWMH--HCLY-DVTGS---DEAAVSVIK  
NVIRPRLVTVVEQDLG-RH-----GGDFLGRFVEALHYYSVAFDALGEG-----  
-----AAAEGRSEEEE-AERHDVERQLLGAEIRNIVAVGGPKR--TG-EVAV-GRWGEEMRRAGFEQVSL  
AGGPAAAQANLLL--GMRLP-----WK--GYTLV---EE--AGCLKLGWKDLSLLTASAWKTGNSHGPA  
EGGEDRDHVQPPRQQQHHHSSLLT

>Pp3c22\_13060V3.1.p

-----MRCDAKEPY-----QSPVPIMNAAPRDDW-----  
-----GKI--ADALSHHQQLPSHNDKAQQGSNGCGAQTREEAR-----  
-----DQSAEMDEDSIAAWVDGTITEMMEA-----MPGVAIE  
QLFTNLPEFL-----SPCNLHLKGLIGCRLQLLLGGAGYPSKNFPPPGPNRS-GKRTR-----EVQ  
VEWTNSKTFQNESQDL-----  
-----HETLPRHHVRPENFISQKKVA--ASLSRVDLRC  
P-----KPLKRSIDNLQLSLEPADERNLRHLHIGLQATQKDQSSHQVRHSRAQSTEPVQ-QHYHKLHTH  
NVQDKADGFLQRSPAP-----SSASQFST-L-----NTMGSEDPPSQPKLPQ  
TTAQNAQRED-----TVAPDEGLQLM-SLLLQCAEAI SADDNNQATAILPQLS  
ELATPFGTS-VQRVVAYFAESMGSRLVTSSL-----GICRPLPCK-----QPASNQS--IVSAMQ  
V-FNE-----ICPFVKFSHFTANQAI AEFEGKFNVHIIDVDIM-QG--L---QWPSLF  
QVLA-SRA----GGP----P-HVHITGLGTSAE-----SLDATGKRLKDFAGSFGISFEFT-AIA-DKM  
SNV-DI-----STL-----KVA-----FSDALAVHWMH--HSLY-DVTGS---DLDTLSLIQ  
K-LNPKVITLVEQDFR--H-----SGTFLSRFLEALHYYSAMFDSL GAT-----



-----CK-----DDS-PERYMVEQQLLSCEIKNIVAFDGPGR--KI-NHKF-DQWRDELSKAGFKPVSL  
SGKA-SHQAALLL-QSLF-P-----CD--GYTLL---EH--SGSLKLGWKDLYLFTASAWTRV-----

>LOC\_Os07g36170.2

-----MDLHQLLKYRLTGANVVYEIPTENNLQNSPWQA-----  
-----NPLKYEFSDSPYTPLSSQFECNLSALTNTPDNQ-SSTETISAQ---PISPLEADSSYRQAG  
ILLQENIQVGADPLYA-----TSRHNMQHALREIE-TVLMA---PDTDDATTSTKHEFEEIKPAQLVRQR  
SRTWSHESRQ-----  
-----PLPGVGRSQFASGGYPT  
ASYEFRPEKRQR-----ELREDPQIIIVK-QLLTRCAEALSEDRTEEFHKLIVQEAR  
GVVVSINGEP-IQRLGAYLLEGLVARHGNSGT-----NIYRALK-----CREPESKE--LLSYMR  
I-LYN-----ICPYFKFGYMAANGAIAEALRTENNIHIIDFQIA-QG--T----QWITLI  
QALA-ARP----GGP----P-RVRITGIDDPVSEYARGEGLDIVGKMLKSMSEEFKIPLEFT-PLS-VYA  
TQV-TK-----EML-----EIR-----PGEALSVNFTLQLHHTPDESVDVNNPRDGLLRMVK  
G-LSPKVTTLVEQESH--TN-----TTPFLMRFGETMEYYSAMFESIDAN-----  
-----LP-----RDN-KERISVEQHCLAKDIVNIIACEGKDRV-ER-HELL-GKWKSRRLTMAGFRPYPL  
SSYV-NSVIRKLL--ACY-----SD--KYTLD---EK--DGAMLLGWRSRKLISASAWH-----

>LOC\_Os07g39470.1

-----MADTPTSRMI-HPFSNIPSONLQKQFQYSD  
NPQHPCHP-----YRAPSDTHVPHH-YGLK---SHSP-DAGYESQATP-----  
-----NKYTLDSSEGAGCMRH-----DSPSSQSFTTR-----SGSPL--SQEDSHS-  
DST--DGS--PVGASC--VT-EDPNDLKQKLDLE-AVMLG---PDSEIVNSLENSVA--NQLS-----  
-----LEPEKWV-----RMMGIPRGNLK-ELLIACARAVEEKNSFAIDMMIPELR  
KIVSVSGEP-LERLGAYMVEGLVARLASSGI-----SIYKALK-----CKEPKSSD--LLSYMH  
F-LYE-----ACPYFKFGYMSANGAIAEAVKGEDRIHIIDFHIS-QG--A----QWISLL  
QALA-ARP----GGP----P-TVRITGIDDSVSAYARGGLELVGRRLSHIASLCKVPFEFH-PLA- ISG  
SKV-EA-----AHL-----GVI-----PGEALAVNFTLELHHIPDESSTANHRDRLLRMVK  
S-LSPKVTTLVEMESN--TN-----TAPFPQRFETLDYYTAIFESIDLT-----  
-----LP-----RDD-RERINMEQHCLAREIVNLIACEGEERA-ER-YEPF-GKWKARLTMAGFRPSPL  
SSLV-NATIRTL--QSY-----SD--NYKLA---ER--DGALYLGWKSRLVSSAWH-----

>GRMZM2G015080\_P01

-----MGSSSVLLFPSSSSAAPSAPHSFPHSHATAIASSH---SLLPPLP-----CSN  
PPPLSSQ----DHVLIHYIHQLDEQE-----AATMVRKRPAAPDMD-----  
-----LPPRRHVTDGLSDVTA AAAAG-GGPGAPS----SASAQLPALPTQL---HQLPP-AFQ-  
-----HHAAEVDVP-----PQPHPPAHSQAGGEAPA---STTAWVDGIIRDIIGS----SGGAVSIT

QLIHNVREII-----HPCNPGLASLLELRLRSL-----  
-----  
-----AA  
DP-APL-----PQQQRALL---H---GAPAAA-AGLALPLPPP---LPDKRRH-----E---PAPRC  
QQQQQEEHPAPQSPK-----VP-----TAEET-----AAASA  
AAAKERKEVQRR-----KQRDEEGLHLL-TLLLQCAEAVNADNLDDAHQTLLEIA  
ELATPFGTS-TQRVAAYFAEAM SARVVSSCL-----GLYAPLPPGS-PA----AARLHGR--VAAAFQ  
V-FNG-----ISPFVKFSHFTANQAIQEAFEREERVHIIIDL DIM-QG--L----QWPGLF  
HILA-SRP---GGP---P-RVRLTGLGASME-----ALEATGKRLSDFADTLGLPFEFC-AVD-EKV  
GNV-DP-----QKL-----GVT-----RREAVAVHWLH--HSLY-DVTGS---DSNTLRLIQ  
R-LAPKVVMTMVEQDLS--Q-----SGSFLARFVD AIHYYSALFDSL DAS-----  
-----YG-----EDS-PERHVVEQQLLAREIRNVLAVGGPARAGAG-GARF-GSWREELARSGFRAASL  
AGGA-AAQASLLL--GMF-P-----SD--GYTLV---EE--K GALRLGWKDLCLLTASAWRPVQTPPCR  
-----

>Sevir.8G008100.1.p

-----MGSSSLLLPSSSSAASPA-----YSHATA--STSSHSSLLPPLP-----  
-----SPQ---DHHLLQYLHHL DQQQ-Q-----ESAAMVRKRPAPDMD-----  
-----LPPRRHV TGDLS DVTAAAASG-GGAPPPQ--SAAASAQLPALPTQL---HL--P-AFQV  
QH HHHHHHAEVDAP-----PAGEVAA---STTAWVDGIIRDIIGS----SGGAXVSVA  
QLIHNVREII-----HPCNPGLASLLELRLRSLN-----  
-----  
-----AA  
DPAAPLHQPLPHP-----PALP-PVPALPPPPPPQLTVTDKRRH-----E-----PQ  
QXGEPTNPS PQQEEPK-----PP-----TAEETAAAAAAAAAAAA  
AAAKERKEEQRR-----KQRDEEGLHLL-TLLLQCAEXVNADNLDDAHQTLLEIA  
ELATPFGTS-TQRVAAYFAEAM SARLVSSCL-----GLYAPLPPAS-PA----AARLHGR--VAAAFQ  
V-FNG-----ISPFVKFSHFTANQAIQEAFEREERVHIIIDL DIM-QG--L----QWPGLF  
HILA-SRP---GGP---P-RVRLTGLGASME-----ALQATGKRLSDFADTLGLPFEFC-AVA-EKA  
GNV-DP-----EKL-----GVT-----RREAVAVHWLH--HSLY-DVTGS---DSNTLWLIQ  
R-LAPKVVMTMVEQDLS--H-----SGSFLARFVEAIHYYSALFDSL DAS-----  
-----YG-----EDS-PERHVVEQQLSREIRNVLAVGGPAR--TG-DVKF-GSWREKLAQSGFRSASL  
AGSA-AAQASLLL--GMF-P-----SD--GYTLV---EE--NGXLKLGWKDLCLLTASAWRPIQTP-CR  
-----

>Aco012593.1

-----MGSSSLLLPPTTTTTTTNTTSSSHDSHFSHYS-----  
-----EEEKELLYLLYLQOQQOQQOQQOQQOQQV----GEVIMVRKRPASELDLQHESSSSSY  
HNPRLP RRGGGGGAA-----AAGGGASSSTAAAQGPFAES-----AA  
AGHPSSLLYSASSGGGALDAPILVQHGGNPTQFLPSLPPPAPAVCGFSGLP LFP AEL-----  
-----ERGGGGGAAAANEGV-----AGRGGADEGAASAWVDGIIRDL LSS-----AAPAVSIP  
QLIHNVREVI-----HPCNPALAAVLEHRLRSLA-----  
-----  
-----SS  
DPLPPPPPPPLPSL-----  
-----PSD-----APSLTSSP-P-----RARSPAPAPTGPASSQ  
VATK-----PTTAAAAAQL-AGGARCAESVAADNLDEANRLLEIS  
ELATPFGSS-AQRVAAYFSEAM SARLVSSCL-----GLYAPLPASS-PA----ALRVHHR--LAAAFQ  
V-FNG-----ISPFVKFSHFTANQAIQEAFDREERVHIIIDL DIM-QG--L----QWPGLF  
HILA-SRP---GGP---P-RVRLTGLGASLD-----ALEATGKRLSDFADTLGLPFEFH-PVA-DKV  
GNL-DP-----DRL-----GVS-----RREALAVHWLH--HSLY-DVTGS---DTNTLWLLQ

R-LAPKVVTMVEQDLS--P-----GGSFLLARFVEAIHYYSALFDSLGLAS-----  
-----YG-----EDS-PERHVVEQQLLSREIRNVLAVGGPAR--SG-DVKF-GNWREKLAQSGFRSVSL  
AGNA-AAQATLLL--GMF-P-----SD--GYTLV---EE--NGALKLWGDLCLLTASAWRPIQTANPP  
R-----

>Sobic.005G017500.2.p

-----MGSSSLLLFPSSSSAASTAPHAFFPHSHATATASTSTSTSLPPLP-----SPHHL  
PLPPSSSSSQSDHFLHHLHQLDRQEAA-----AAAAMVRKRPAQDMD-----

-----LPPPRRHVTGDLSDVTAAG--SGGAPPS-----SASAQLPALPTQL---HQLPP-AFQ-  
-----HHAAEVGVVPAPPPPPNPAHAQAGGEEAAA----STTAWVDGIIRDIIGS----SGGAAVSIT  
QLIHNVREII-----HPCNPGLASLLELRLRSL-----

-----AA  
DP-APLPPPPPPQPSQQHALL--HGVGAPAAA-AGLTLPPPPP---LQDKRRH-----EPPPPPPPP  
QQQQQEEPHPASQSPK-----AP-----TAEETAAAAAAAAAAAA  
AAAKERKEEQRR-----KQRDEEGLHLL-TLLLQCAEAVNADNLDDAHQTLEIA  
ELATPFGTS-TQRVAAYFAEAMSARLVSSCL-----GLYAPLPPGT-PA----AARLHGR--VAAAFQ  
V-FNG-----ISPFVKFSHFTANQAIQEAFEREERVHIIDLDM-QG--L----QWPGFLF  
HILA-SRP----GGP----P-RVRLTGLGASME-----ALEATGKRLSDFADTLGLPFEFC-AVA-EKA  
GNV-DP-----EKL-----GVT-----RREAVAVHWLH--HSLY-DVTGS---DSNTLWLIQ  
R-LAPKVVTMVEQDLS--H-----SGSFLLARFVEAIHYYSALFDSLGLAS-----  
-----YG-----EDS-PERHVVEQQLLSREIRNVLAVGGPAR--TG-DVKF-GSWREKLAQSGFRAASL  
AGSA-AAQASLLL--GMF-P-----SD--GYTLV---EE--NGALKLWGDLCLLTASAWRPIQMPPCR  
-----

>GRMZM2G342217\_P01

-----MGMLNCVDTTSGA-----GAKLQHQQQAPTSPT-----  
-----ASVSESNIVAPS-----VSADIDANDALASLQALRFD-----  
GDI-DVEIQSPDIAMWESLFAEQMGAA--GGDFLML-SPRRDFMAAGSPRRDFMVS-----  
-----SPKRDMV-S-----SSPKRDYMM-SSPMR-DLMASSPKREYMVSSPRRD--SSSSR  
RSPFSPNLF-----TSGGG-----HQHGYYA--HGPTDGGVGGAGQPLY-GGLANHH----GK GK  
SQ-SPLHKGYINN-----SGNKQSTGPSSLSCSSSY-GHA----DNDLPSMDTCFLD-----DYKGGY  
IGYQQMPGKQQAAPGIMVNNNGCSTAVTTVGVAPSPSSHQ-LPTLSECLAMPEPAF----VGEEAAA  
G-----GLQMG-VGLPSDLYAGQFAGGGGGGLTTTSS-----  
-----SLQHMAKS-----DHQWAAAE-S-----SLHSMGLS-----  
-----VIQTEAD-----EQEQDSGLQLV-HLLACADVFVSKGDQPSALRHLHLLR  
RVASPLGDS-MQRVASYFADALAARLS-SNNPSS-----SAGAGAGAGVAPYTFPPSPD--TLKVYQ  
I-LYQ-----ACPYIKFAHFTANQAIFEAFHGEDRVHVVDLDIL-QG--Y----QWPAFL  
QALA-ARP----GGP----P-TLRLTGVGHPAA-----AVRETGRHLASLAASLRVPFEFHAAVA-DRL  
ERL-RP-----AAL-----HRR-----VGEALAVNAVNRHLRVP---AVH---LGPLLSMIR  
D-QAPKIMTLVEQEAG--HN-----GPYFLGRFLEALHYYSALFDSLGLAT-----  
-----FP-----ADS-AQRMKVEQCLLAPEIRNVVACEGAERV-AR-HERL-DRWRRIMEGRGFEPVPL  
SPAA-VAQSQVLL--GLYGA-----GD--GYRLT---ED--RGCLLLGWQDRATIAASAWRC-----  
-----

>Pp3c11\_23910V3.1.p

-----MTATHVASNKRS-----STSFPEFVTAPCKRW-----  
-----KSEAAWHHVEEIVPEPPPAQDFDLKVKTCYSN-----  
-----MVH-----

```
-----PEPTSVLDLQ-----TSPGRSC-SSTSLSSGT-----DSPHSVST
DSSNFSTTLQ-----QVEQDDIANWVDCMGLPEFEECGRPLEEVLKSDIDFN-----
--TTDIDFGFEMTSLEHCSAVAHEHDFSVSLLSDFLGP-----
-----DENLLLPESEFHYAKRLQELDDS--LSSMLNEVRS
SGSDSESSI-----
-----PTTAELVRL-----VEAQSCED-L-----GRQRACGAR-NHHHSRA
GSLGSTSEPQTL-----QQPENSGLQLV-HLLLACAEAIKSHFHKANPILDQLG
RFSNAYGGP-MQRIALYFGNALS NHLA-----GVVSP-----TDPHSPSD--SKFAYQ
A-FYK-----ILPFAKFSHVTANQTIYEAVLRSQNVHVVDLDIQ-QG--L----QWPCFI
QSLA-MRP----GGA----P-HLRISAVGMNME-----SLQTTKRWLTEFAEDLKVPFEFT-PVL-STL
ENL-TP-----AML-----NIR-----AEDDLAINCSQVLHTLS-GDEAV---LEKLLCMFR
N-LRPNVVTLLAEAN--YN-----AASFITRFIEALHYICALFDSLEGA-----
-----LG-----RDS-ADRFHIESTAFAAEINDILASKDSSRR-VR-HVRS-ETWRALFKKAGFRSMAF
SSYT-VRQAQMLL--EILTSKHLMQANSPIPYKLS---EE--STSLILGWQETPVIGVSAWSC-----
-----
```

>Sevir.2G354000.1.p

```
-----MDLHQLLKYRLTGANVFYEFPTENNLANNPWPG-----
-----TPLKSEFSNSPYTPLSAQLECDNLSAISNTPDNQ-SSTETISAQ---PISPLEVDSSNRQAG
I-LWENTQVRPDHLYT----TSRHNMQHALRKIE-TVLMA---PDADDAATSTKHEFEHKPAPLMRQR
SRTWSHELRO-----
-----PSPGVVRTQFAS-GYPT
ASYEFRPEKRQR-----ELREDPQSMVK-QLLTKCAEALSEERIEEFLKLVQQAR
GVV SITGEP-IQRLGAYLLEGLVARHGNSGT-----NIYRALK-----CREPESNE--LLSYMK
I-LYN-----ICPYFKFGYMAANGAIAEALRNEDKIHIVDFQIA-QG--T----QWITLI
QALA-ARP----GGP----P-HVRITGIDDPVSEYARGEGLDLVGKMLKSMSEEFRIPLLEFT-PLPGVYA
TQV-TK-----EML-----DIR-----PGEALAVNFTLQLHHTPDESVDVNNPRDGLLRMVK
G-LSPKVTTLVEQESH--TN-----TTPFLMRFSETMDYYSAMFESIDAN-----
-----LP-----RDS-KERINVEQHCLAKDIVNIIACEGKDRV-ER-HELL-GKWKSRMTMAGFKPYPL
SSYV-NSVIRKLL--ACY-----SD--KYTLE---EK--DGAMLLGWKSRKLI SASAWH-----
-----
```

>Aco022504.1

```
-----MLAGW-----HQYLRSEASLQLQVC-----
-----QFQLQEKMGTRQLDLPCGFAKRENHPRVLS-----
-----LEKPIDPRSTSCSFRQNPLAAPSS
SSL-----VAKIEPTDQ GALWEESSRRLKRFHERDCFEE-SILARAKRTRTGEAG
QLVGGGGGGGGGDEDIWFPE SIERTPFV-----E
EEKVFLVP-----SAASFPVDNTSLVGSFESE---KDFEWPNTK
SQSDS-----SSSSGT-----
-----GGLSPKPEI-----ETE-----NRNDVVAYT
VGGAGVDES-----TRIESEGLG LL-NLLTSCVEAIGAGNHEAVNYLLARLG
EQASPKGTP-IHRVVAYFTEAVALRVAKLWP-----HIFSITSPRELTD----HLEDEEN--DAIALR
L-LNH-----VSPIPKFLHFTCNERLLRAFEGKERVHIVDFDIK-QG--L----QWPSLF
QSLA-SRP----QPP----A-HVRITGVGECRQ-----ELLNTGVRLSRFAEALNLPFEFH-AVT-DRL
```

```
EDV-RL-----WML-----HVK-----RDECVAVNCVLMHKLLYDETGSA--LMDFLGLIR
S-VKPEVVLTAEQEAD--HN-----DERWELRLGKSVQYYSVAFDSDLDC-----
-----LA-----SDSPAARAKIEQ-MFAREIRNLVACEGDERF-ER-HERF-SKWIKKMEDGGYRSAGI
GERE-IVQSQLIL--RMYA-----SD--KYSVEKRGEGV-SEGLSLRWVDQPLYTVSAWALSEVGGSS
STSLPC-----
>Sevir.8G136700.1.p
```

```
-----
-----MGMLNCADTSS-----GAKLQ-QLQAPTSPT-----
-----ASVSESNIVVS-----STDPDANDALAGLQALKFD-----
GDI-DVEIQSPDIAMWESLFAEQMGAS--GGDFLMSFSPRRDFTATGSP-RRDFMVS-----
-----SPKRDYMM-----SSPKRDYMV-SSPKR-DYMMSSPKREYMTSPRRD---SSPR
RSTFSNLYSG-----TGS-----HQQGYVDGVHGAEGGSGSGGGQPLY-GGLANH-----GKGK
SQ-SPLHKVYINN--AHSNGG--RSTGPSSLSCSSSY-GHG---ESLSLPSMDP-FLD-----EYKEGGG
YLAGYQLPVKT-----GMENGAASAATVTTVAPSPSQ---LPTLSECLAMPEPVY---GGSEAAAA
G-----GLQMG-AGLPAELYGGQFGGDF-----
-----TLQHQMAKS-----DQW--AGD-S-----SLHSMLGS-----
----VIQTEA-----EQEQDSSLQLV-HLLLACADVFVSKGDQPSALRHLHLLR
RVASPLGDS-MQRVASYFADALAARLSLSSNPSSSSSSSSGAATPRGGAAAGVAPYTFPPSPE--TLKIYQ
I-LYQ-----ACPYIKFAHFTANQAI FEA FAGEDRVHVVDLDIL-QG--Y----QWPAFL
QALA-ARP----GGP----P-TLRLTGVGHPAA-----AVRETGRHLASLAASLRVPFEFHAAAA-DRL
ERL-RP-----AAL-----QRR-----VGEALAVNAVNRHLHRVP---SAH---LGPLLSMIR
D-QAPKIMTLVEQEAG--HN-----GPYFLGRFLEALHYYS AIFDSL DAT-----
-----FP-----ADS-APRMKVEQCLLAPEIRNVVACEGAERV-AR-HERL-DRWRRLMEGRGFEPVPL
SPAA-IGQSQVLL--GLYGA-----SD--GYRLT---ED--KGCLLLGWQDRAIIAASAWQC-----
-----
>LOC_Os07g38030.1
```

```
-----
-----MLQGVLSRAPGAD-----AAAMK-AKRAADD-----
-----
-----
-----
-----
-----
-----
-----
-----EEE-----GGERERAR-G-----KRLAAEGKQGLVVVSTG
EEEE-----AAAETRGLRLL-SLLLRCAEAVAMDQLPEARDLLPEIA
ELASPGSS-PERVAAYFGDALCARVLSSYL-----GAYSPLA--LRPL----AAQSR--ISGAFQ
A-YNA-----LSPLVKFSHFTANQAI FQALDGEDRVHVIDLDIM-QG--L----QWPGLF
HILA-SRP----TKP----R-SLRITGLGASLD-----VLEATGRRLADFAASLGLPFEFR-PIE-GKI
GHVADA-----AALLG-----PRH-----HGEATVVHWMH--HCLY-DVTGS---DAGTVRLK
S-LRPKLITIVEQDLG--H-----SGDFLGRFVEALHYYSALFDALGDG-----
-----AGA--AEAEA-AERHAVERQLLGAEIRNIVAVGGPKR--TG-EVRV-ERWGDELRRAGFRPVTL
AGSP-AAQARLLL--GMY-P-----WK--GYTLV---EE--DGCLKLGWKDLSLLTASSWEPTDGDADA
DVAVAGDTHHESHDS-----
>AT1G66350.1
```

```
-----
---MKREHNHR-----ESSAGEGSSSMTTVIKEEA-----AG-----VDELL-----
-----
-----VVLGYKVRSSDMADVAHKLEQLEMVLG-----
```

```
-----D
GISNLSDETV-----HYNPSDLSGWVESMLSDDLDPTRIQE-----
-----
---KPDSEYDLRAIPGSA-VYPR-----DEHVTRRSKRT-----
-----RIESELS-----STR-----
-----SVVV-----LDSQETGVRLV-HALLACAEAVQQNNLKLADALVKHVG
LLASSQAGA-MRKVATYFAEGLARRIYRIYPRDD-----VALSS--FSDTLQ
IHFYE-----SCPYLKFAHFTANQAILEVFATAEKVHVIDLGLN-HG--L----QWPALI
QALA-LRP----NGP----P-DFRLTGIGYSLT-----DIQEVGWKLGQLASTIGVNFEFKSIAL-NNL
SDL-KP-----EML-----DIR-----PGLESVAVNSVFELHRLI-AHPGS---IDKFLSTIK
S-IRPDIMTVVEQEAN--HN-----GTVFLDRFTESLHYSSSLFDSLEGP-----
-----PS-QDRV-MSEFLGRQIILNLVACEGEDRV-ER-HETL-NQWRNRFGLGGFKPVS I
GSNA-YKQASMLL--ALYAG-----AD--GYNVE---EN--EGCLLLGWQTRPLIATSAWRINRVE---
-----
```

>Pp3c7\_1494V3.1.p

```
-----
-----MADGDL-----ASIFRQHTQPVS DPW-----
-----GVAVPQHQLSHFQQMPQTLQD TDNVRWDY-----
-----
-----PNS
LSPQSPFDIQ-----DHNSNFSTRMLQSKVGSYNHSYSSLRPSTIP-----
-----PQSHLQFSTISPQLVEPVQSLQSQTL SGNKRDF-----
QGSSFQVQNKQPTRSAGRNIYSEVV TSTSPVGOENLVTVSHHQSFSGNNYNISHGQP--STWPTAPTGC
KVGE-----LATELQPEILGDLRPGPGYLADHYPGRLL
QSGQAYNQNLGPQG-----NPNDLPSG-S-----GTLSSSLQQNFPGDDGM
IRVLDTACSRRN-----QQT SATGLQLV-HLLLLCAEAI SNQQMDLAHVVLTRLN
AMLVPCTST-MQRLAAVFVDALHARITNSATT-----GRYKGLER-----DNDVAILD--MLQSFS
V-IYD-----HTPFIKLPHLTLNQIILD AVEGEPHVHVIDLNTGWRG--M----QWPGFI
QALA-LRP----GGP----P-KLRITAI GKAD-----DLEHSREKLQDYARHLQVPFEFC-PLV-VDM
KSF-DV-----RLL-----DMR-----DWEVVCINSANQFHQLLIWGDEC---FHKFLCDLK
S-LNPRVLAFTENDAD--HN-----SPKFLNRFFECLRYYSAVYDALDSS-----
-----LP-----NGS-AALQQVEHLFTGQKIRNIVAMEGEDRI-TR-HESL-TSWSRRMEMAGFRPVPV
SSRA-ISQAGLLL--RMYFA-----QS--GYTLR---TE--NGNVSLGWDNMSLVGASAWRA-----
-----
```

>Sobic.002G354900.1.p

```
-----
-----MADTPTSRMV-HPFGDVPRQTPKQFLYSG
NSQHLCYP-----YQSASDTHVVPQRHCTMR---SHSP-DAGSEDHDNH-----
-----KQYTL DSSATSGCSRH-----DSPSSQSVHAG-----SGSPV--SLED SHS-
GSTNGNGS--PVSASC--VT-EDPTDLKQKLDLE-AAMLG---TDPEIVNSLEISIA--DQLS-----
-----
----LEPEEWK-----HMMSMPGGNLK-ELLIACARAVEYNNSYAIDLMIPELR
KKVSVSGEP-LERLGAYMVEGLVARLAASGS-----SIYKALK-----CKEPRSSD--LLSYMH
F-LYE-----ACPYFKFGYMSANGAIAEAVKGEDRIHIIDFHIA-QG--A----QWISLL
```

QALA-ARP----GGP----P-FVRITGIDDSVSAYARGGGLELVGRRLSHIAGLYKVPFQFD-AVA-ISS  
SEV-EE-----GHL-----GIV-----PGEAVAVNFTLELHHIPDETSTANHRDRILRLVK  
G-LSPKVLTLVEQESN--TN-----TAPFAQRFAETLDYYTAIFESIDLA-----  
-----LP-----RDD-RERINIEQHCLAREIVNLVACEGEERV-ER-HEVF-GKWKARLMMAGFRPSPL  
SALV-NATIKTLL--QSY-----SP--DYKLA---ER--DGVLYLGWKNRPLIVSSAWH-----  
-----

>Bradi4g18390.1.p

-----MCSRMGTLNCSDTTS-----SVKLQ-QQQGPTSPT-----  
-----ASFSESNIIVAS-----STDPDAIDALAGLQALRFD-----  
GDI-DGEIQSPDLAMWESLFADQIGAS--GADFLMS-SPRRDFSP-----LRDFMVS-----  
-----SPKRDMV-----SSPKRDYMM-SSPKR-DYMMSSPKRDYMVSSPKREMGVSSPR  
RSTFSNLYSS-----TINQA-----NQOSYMHGMEG-----SPQTQY-SNLASQG----NKGK  
SSPSPLHKVYINNVAHSNSG--KSNPSSLSCSSSY-AHG---ENLPLPSMDP-FLE-----EYKEGYL  
---AYQLPEKA-----GGSESARTT-----APTSSQ-LPTLSECLAMPEPGY----GDGDDDTA  
AAIVARAGIQVGGGLQQTDLHYLYASQFGAAE-----GSLs-----  
-----SLQHQMAKP-----EQW--ADS-S-----SLHSMLGS-----  
----VIQSEADQ-----QQEQDSGLQLV-HLLLACADLVSKGDQPSALRHLHLLR  
RVASPLGDS-MQRVASYFADALAARLALA-----CPSSVVSPGGAPFPFPSPD--TLKIYQ  
I-LYQ-----ACPYIKFAHFTANQAI FEAFOGEDRVHVVDLDIL-QG--Y----QWPAFL  
QALA-ARP----GGP----P-TLRLTGVGHPAA-----AVRETGRHLASLAASLRVPFEFHAAVA-DKL  
ERL-RP-----AAL-----QRR-----VGEALAVNAVNRHRVP---GAH---LAPLLSMIR  
D-QAPKIMTLVEQEAG--HN-----GPYFLGRFLEALHYYS AIFDSL DAT-----  
-----FP-----ADS-APRMKVEQCLLAPEIRNVVACEGAERV-AR-HERL-DRWRRIMEGRGF EAVPL  
SPAA-VGQSQVLL--GLYGA-----GD--GYRLN---ED--KGCLLLGWQDRAIIGASAWRC-----  
-----

>Bradi1g23350.1.p

-----MANTPTSRMM-HPFGSVPRQNLKQFQYSD  
NAQHTCHP-----YQSSPDTHVVPQHDIYSLK---SHSP-DAGFENQVTH-----  
-----MKYTLDSAEVGC MRH-----DSPSSHSFTPRSD-----SSSPL--SQEDSHS-  
DST--NGS--PVSASCVTVT-EDPNHLRQKLDLE-AVMLG---PDSEVVNSLESSIA--NQLS-----  
-----

----LEPEKWV-----QMMRFPRDNLK-ELLVACARAVEEKNGYAIDMMIPELR  
KMVSVS GEP-LQRLGAYMVEGLVARLASSGH-----SIYKALK-----CKEPKSSD--LLSYMH  
F-LYE-----ACPYFKFGYMSANGAIAEAVKGEDRIHIIDFHIS-QG--A----QWISLL  
QALA-ARP----GGP----P-TVKITGIDDSVSAYARDGGLDIVGRRLSHIAGLCKVPFEFH-AVA- ISG  
DEV-EE-----RHL-----GVI-----PGEALAVNFTLELHHISDETSTANHRDRILRLVK  
S-LSPNVTLTLVEQESN--TN-----TAPFVQRFAETLDYYTAIFESIDLT-----  
-----LP-----RDD-KERINMEQHCLAREIVNLVACEGSE RV-ER-HEVF-GKWKARLMMAGFRPSPL  
SSLV-NDTIRTLL--QSY-----SV--NYQLA---ER--DGVLYLGWKNRPLIVSSAWH-----  
-----

>Solyc08g080400.1.1

-----MLAGCSSSLLSP-----RHRLRSEASAQFQAC-----

```
-----NFP---SMSTQRLDLPCSFARKDTSRSQISRPVGLSVE---  
-----  
-----KPIEAKNSTCSLKQNI RLPSS  
TSAQTSYVEG-----RRESKD-----EFWEKGRSLKRYAEQGCIDDESCMS-RAKRKKSNRKSGDSS  
EDGYDLSLSQLGGGDFWLQSGFNAARSVPLIAGLHPPQAAPFSFSCSG-----E  
EESVCYVP-----NEVISPPPLMSNNPWIESVTE--ITNFGDKNVS  
TSQDLAR-----EASVSSASLDS-----  
-----HGLVLRPNE-----NLGEHEVG-N-----GSRLPNPNDRGEVVTAH  
NGHN-----NHREDDAAELI-SLLVSCVEAIGSRNVTGVNQLIARLG  
QLASPRGSP-VSRLTAYFTEALALRVARIWP-----HIFHIIPPRDL-----DRLDDD--SSTALR  
L-LNQ-----VSPIPKFIHFTSNEILLRAFEGKDRVHIIDFDIK-QG--L----QWPSLF  
QSLA-SRP----NPP----T-HVRITGIGESKQ-----DLVETGDRLAEFAEALNLAFEFH-PVV-DRL  
EDV-RL-----WML-----HVK-----EGESVAVNCVLQMHRLLYDSSGGI--LRDFLGLIR  
S-TNPTIILMAEQEAE--HN-----EPSLEARLVNSLRYAAVFDIAFG-----  
-----LP-----LDS-PARIKIEE-LFARDIRNIIACEGRDRT-ER-HECF-GKWRKLMEQGGFRCTGI  
TERE-LLQSQMLL--KMYS-----CE--DYRVTKQGND--DAALTL SWLDQPLCTVSAWTPIDAAGSS  
SSYYQPS-----  
>Brast02G278200.1.p
```

```
-----  
-----  
---MKREYQDA-----GGSRRGGDMGSPKDKMMVAA-----PA---EEED-VDELL-----  
-----AALGYKVRASDMADVAQKLEQLEMAMGMGGV-GAGAAPD---  
-----  
-----DG  
FAAHLATDTV-----HYNPSDLSSWVESMLSELNAPPPPLPPA-----  
-----  
-----PQAPRLSCNSSTVTG---G---GGYFD-LPP  
SVDSSSSTYALKPIPSPV-VTPA-----EP-SADPAREP-----  
--KRMRTGGGSTSSSS-----SSSSSLGG-G-----GTMSVVEAAPP-----  
-AANAPALPVVV-----VDTQEAGIRLV-HALLACAEAVQQENLSAAEALVKQIP  
LLAASQGA-MRKVAAYFGEALARRVFRFRPQPD-----SLLDAA--FADLLH  
AHFYE-----SCPYLKFAHFTANQAILEAFAGCRRVHVVDVDFGIK-QG--M---QWPALL  
QALA-LRP---GGP---P-SFRLTGVPQP--DETDALQVGVKLAQFAHTIRVDFQYRGLVA-ATL  
ADL-EP-----FML-----QPEGEEDPNEEPEVIAVNSVFEMHRL-L-SQGA---LEKVLGTVR  
A-VRPRIVTVVEQEAN--HN-----SGSFLDRFTESLHYSTMFDSLEGAGSGQS-----  
EISPGAA-----AGA-TDQV-MSEVYLGRQICNVVACEGPRT-ER-HETL-GQWRGRLGQAGFETVHL  
GSNA-YKQASTLL--ALFAG-----GD--GYKVE---EK--DGCLTLGWHTRPLIATSAWRMAAP-----  
-----  
>Sobic.002G342800.1.p
```

```
-----  
-----MLQGVLSRAPATDAAA--AAAMK-AKRSAASPG---  
-----  
-----  
-----  
-----  
-----  
-----  
-----  
-----EEE-----EGDGRSARGG-----KRQQLLALGPATALASA  
VAAE-----EGPETRGLRLL-SLLLRCAEAVAMDQLTEARELLPEIA  
ELASPFSS-PERVAAYFGDALCARVLSSYL-----GAYSPLA--LRQL---AAQSR--VAFAFQ
```



A-YNA-----LSPLVKFSHFTANQAILQALDGEDCLHVIDLDIM-QG--L----QWPGLF  
HILA-SRP----RKP----R-SLRITGLGASLD-----VLEATGRRLADFAASLGLPFEFH-PIE-GKI  
GHVADA-----AALLGSRQHQN--QQR-----DDEATVVHWMH--HCLY-DVTGS---DVGTVRLLR  
S-LRPKLITIVEQDLG--H-----SGDFLGRFVEALHYYSALFDALGDG-----  
-----AGA---AEEES-AERYAVERQLLGAEIRNIVAVGGPKR--TG-EVRV-ERWGDELRRAGFRPVSL  
AGSP-ATQARLLL--GMY-P-----WK--GYTLV---EE--DACLRLGWKDLSSLTASAWEPADDAAS  
APTTTS-----

>GRMZM2G131516\_P02

-----MPPPPPPPLTPYCRRCPPPHL  
PPPPSSP----NHFLLHYLHQLDHQE-A-----AAAAMVRKRPASDMD-----  
-----LPPRRRHVTGDLSDVTA AAAAGVGGSGAPS----SASAQLPALPTQL---HQLPP-AFQ-  
-----HHAPEVDVPA-----HPAPAAHAQAGGEATA---STTAWVDGIIRDIIGS----SGGAAVSIT  
QLIHNVREII-----HPCNPGLASLLELRLRSL-----

-----AA  
DP-APL-PPPPQP-QQHALL--H--GAPAAAPAGLTLPPPPP----LPDKRRH-----E---HPPPC  
QQQQQEEHPAPQSPK-----AP-----TAEETAAAAAAAQAAAA  
AAAKERKEEQRR-----KQRDEEGLHLL-TLLQCAEAVNADNLDDAHQTLLEIA  
ELATPFGTS-TQRVAAYFAEAMSARLVSSCL-----GLYAPLPPGS-PA----AARLHGR--VAAAFQ  
V-FNG-----ISPFVKFSHFTANQAIQEAFEREERVHIIDLIDIM-QG--L----QWPGLF  
HILA-SRP----GGP----P-RVRLTGLGASME-----ALEATGKRLSDFADTLGLPFEFC-AVA-EKA  
GNV-DP-----EKL-----GVT-----RREAVAVHWLH--HSLY-DVTGS---DSNTLWLIQ  
R-LAPKVVMTMVEQDLS--H-----SGSFLARFVEAIHYYSALFDSLDS-----  
-----YG-----EDS-PERHVVEQQLSREIRNVLAVGGPAR--TG-DVKF-GSWREKLAQSGFRAASL  
AGSA-AAQASLLL--GMF-P-----SD--GYTLV---EE--NGALKLGWKDLCLLTASAWRPIQVPPCR  
-----

>GRMZM2G431309\_P01

-----MADTPTSRMV-HPFGDAPRQTPKQFLYSG  
NPQHLCHP-----YQSAPDTHVVLQRRYTVRSQ--SHSPNAGSEDHETH-----  
-----KQYTLSSAASGCSRH-----GSPSSQSVHAG-----SGSPV--SHDDSHS-  
GSTNGHGS--PVSASC--VTGEDPTDLKQKLDLE-AVMLGTSETDPEIVNSLEISAA--NQLS-----

-----LEPEEWE-----HMVSMPRGNLK-ELLIACARAVERNNSYAIDLMITELR  
KMVSVSSEP-LERLGAYMVEGLVARLAASGS-----SIYKALK-----CKEPRSSD--LLSYMH  
F-LYE-----ACPYFKFGYMSANGAIAEAIKGEDRIHIIDFHIA-QG--A----QWVSL  
QALA-ARP----GGP----P-FVRVTGIDDSVSAYARGGLELVGRRLTHIAGLYKVPFQFD-AVA-ISG  
SEV-EE-----EHL-----GVV-----PGEAVAVNFTLELHHIPDETSTANHRDRILRLVK  
G-LSPKVLTLVEQESN--TN-----TAPFAQRFAETLDYYTAIFESIDLA-----  
-----LP-----RDD-RERINIEQHCLAREIVNLVACEGEERV-ER-HEVF-GKWKARLMMAGFSPSPL  
SALV-NATIKTLL--QSY-----SP--DYKLA---ER--DGVLYLGWKNRPLIVSSAWH-----

>AT1G14920.1

```
---MKRDHHHH-----HHQDKKTMMNEED-----DGNGM-----DELL-----  
-----AVLGYKVRSEEMADVAQKLEQLEVMMSNVQ-----  
-----  
-----ED  
DLSQLATETV-----HYNPAELYTWLDSMLTDLNPP-----  
-----  
-----SSNAEYDLKAI PGDA-ILNQFAIDSASSSNQGGGDTYTTNKRLKCSNG-----  
-----VVETTTATAE-----STR-----  
-----HVVL-----VDSQENGVRLV-HALLACAEAVQKENLTVAEALVKQIG  
FLAVSQIGA-MRKVATYFAEALARRIYRLSPSQS-----PIDHS--LSDTLQ  
MHFYE-----TCPYLKFAHFTANQAI LEAFQGGKRVHVIDFSMS-QG--L----QWPALM  
QALA-LRP----GGP----P-VFRLTGIGPPAP--DNFDYLHEVGCKLAHLAEAIHVEFEYRGFVA-NTL  
ADL-DA-----SML-----ELR-----PSEIESVAVNSVFELHKLL-GRPGA---IDKVLGVVN  
Q- IKPEIFTVVEQESN--HN-----SIFLDRFTESLHYYSTLFDSLEGV-----  
-----PSG-QDKV-MSEVYLGKQICNVVACDGPDRV-ER-HETL-SQWRNRFSGAGFAAAHI  
GSNA-FKQASMLL--ALFNG-----GE--GYRVE--ES--DGCLMLGWHTRPLIATSAWKLSTN----
```

>Pp3c7\_1530V3.1.p

```
-----  
-----  
-----MAATHVVSCKRS-----PTIFSEVATATCKRW-----  
-----KSEAAWHHVEEMAPEPPPIQDFDLKVKTSCLK-----  
-----MVQ-----  
-----PEPTSVLDLQ-----ASPGRSCSSSTSLSSGT-----DSPHSIST  
DSPNFSTTVQ-----QVEPVDIASWVDCMALPEFEDCDRHLEEVLSKSDIDFA-----  
--STDLDFGFELTSLDHCSVVTEHGYSVLLSEFLGDP-----  
-----DENLLLPEFHDARLQELDDS--LSSMLSEVRS  
SGSDSGSSV-----  
-----PTTVELARL-----VESLPCSD-L-----RRHGGVDTKHHHHHSRS  
ESWGSTSKLQTL-----QHPEDSGLQLV-HMLLACAEAEIEKSDFNKAKPILDQLL  
RSSDPYGDPMQRIALYFGEALTDHLA-----GVVSP-----SETHLLSD--SKLAYQ  
A-FYK-----VLPFAKFSHVTANQTIYEAVVRSQNVHVVDLDIQ-LG--L----QWPCFI  
QSLA-MRP----GGA----P-HLRISAIGTNAE-----NLQTTKRRLSEFAEALKVPFEFT-PVL-SSL  
ENL-TA-----AML-----DIR-----SEEDLAINCSQVLHTLS-GEEAV---LDKLLSMFH  
N-LKPNVVTLLAEAN--HN-----GASFIARFVEALHYICALFDSLEGA-----  
-----LG-----RDS-ADRYHIESTALAAEIKEIVAFKGNRRR-VR-HVRS-ETWRGLFAKAGFLSMAF  
SSYT-VQQAQMLL--EVLTSKPMQANATMPYKLS---QE--STSLILGWQETPVIGVSAWTC-----
```

>GRMZM2G098517\_P02

```
-----  
-----  
-----MADPPTSRMVQHHPFGDIPSQTPKQFLYSG  
SSQHLCHP-----YQSASDAHVAPQRHYTVRSQSQSQSP-DAGSEDFETH-----  
-----SRQYTLDSSSASGCSGH-----GSPSCQSVHAG-----SRSPVSHSHDDSHS-  
GSTNGNGS--PASASC--VT-EDPTDLKQKLDLE-AVMLGT-DTDPETVDSLEIAIA--DRLS-----  
-----  
-----VEPEEWKN-----NMVSVPRGDLK-ELLIACARAVEQNGYSIDLMPVELR
```

KMVSVSSEP-LERLGAYMVEGLVARLAASGS-----SIYKALR-----CKEPRSSD--LLSYMH  
F-LYE-----ACPYFKFGYMSANGAIAEAVKGEDRIHIIDFHIA-QG--A----QWSLL  
QALA-ARP----GGP----P-FVRVTGIDDPVSAYARGGGLVGVKRLSHIAGLYKVPFQFD-AVA- ISG  
SEV-EE-----GHL-----GVV-----PGEAVAVNFTLELHHIPDETSTANHRDRVLRVVK  
G-LSPRVTLTVEQESN--TN-----TAPFAQRFAETLDYYAAIFESIDLA-----  
-----LP-----RGD-RERINIEQHCLAREIVNLVACEGEERV-ER-HEVF-GKWKARLMMAGFRPSPL  
SALV-NATIKTLL--QSY-----SP--DYKLA---ER--EGVLYLGWKNRPLIVSSAWH-----  
-----

>Aco010118.1

-----  
-----  
-----  
-----  
-----MTEQGFEADCALGI IQSNDQWLCNQIGFALPPDNMQMTAPPYDRS  
LLDGHYTATV-----TATATDLSEFMDQLIRPNPSLS-----  
-----

-----QNTDDFSID-----NTPSNN-----NYVAQSDVHTPPQKAPR  
RDCYERSGDEGG-----E---RPHHDHEMRMI-TLLMECAVQISTENLGEAQNMLLELT  
QMASPYAASCAERVVAYFAEAMASRIVNSCI-----GVCSP-----LLPYKT--ILSAFQ  
A-FNN-----LSPFIKFGHFTANQTILEAFHQEERIHIIDLDIM-QG--L----QWPALF  
HILA-TRP----NGP----P-QVRMTGLGSPGP-----VLEETGMQLAGFARRLGMRFEFH-PIA-RRS  
GDL-DP-----SSVIIPP-----GRR-----SGEAVAVHLMR--HALY-DATGD--ESNTMRLL  
H-LGPRVVTLEQEMG--HN-----CGPFLGRFVFGALHYFSTVFDLSS-----  
-----WA-----VDD-VGRHRVESGLLAREIANVVAVGGPGR--GG-EEKV-GRWRDELARRGFVQVEM  
SGNA-MAQAQLIV--NMFPP-----AL--GYSVLH--GS--DGSLLGLGWKAGLYTASAWTARSSL--  
-----

>Pp3c2\_18410V3.1.p

-----  
-----MAEITHYRPHSDTNTVKFATVPDL  
QTYLGISSWLELNQHWRLGDATKFFKVAEHEGQNSMSSAV-----DSKRLDSGKSGNQHS-----  
-----TALAMSKEPTSVLDLPSSCSVSLSSQHSMSVSDGISK-----  
-----

-----LQTVADQLLSDEQDSAHPMQ  
SATPETS NML-----MDQ--DVMTWMSLTRGSDHSASDMDPVPDWFHKQPER-LDLNAQQYYCSKTGL  
DFHKNPMTMERICNNLPSSHHHYVAQPFKLI SQAQLTMSETAGNQQTGFFD-----  
-----TSTSSNQRAFQQCRNVKAQGAT--LMSMIDGTGA  
ITGSQLLNSTVVPTPELWKLLSSQ-----HDASPQCGNQG-----  
-----PPNKQAPIT-----QARDQQR-S-----TSLAIPTQQPQPQLPYH  
FGQTLYPGVT-----PQDQETGIH MV-HLLACAEAVDMCQSATAGPMLARLR  
SIYDPEGEP-MRRIALYFAEALFERLTIEMNRKQSSHHGSCVRFPEPEVD---SAASPSLE--CDIAYQ  
A-YYQ-----ILPFKKFTHLTANQALLEGVANYPRVHIIDFNIR-QG--L----QWPSFI  
QSLA-MLP----RGP----P-QLKFTAVQTDAA-----TVQKTGNRLAEFARTMHVPEFVY-ILE-ESV  
ESF-HQ-----GMI-----SPR-----AEEALAVNCS DMLHRLR-RKEGK---LTEL LGKIR  
S-LQPVVVTVLEVDAN--HN-----EPSFMPRFVHALHYCAVFD SLEAA-----  
-----LL-----RNS-LDRLRIENHCFSTQIRSI IALEDV DRE-IR-HVRA-ETWQSHFLQAGFRAVTV  
SRYA-ADQAQLLL--GLYKP-----SDRMPFTLS---SG--FGGLSLGWRET P VAVSSWTFSPPY--  
-----

>Solyc04g064550.1.1
